# Supplementary material for: Novel Fluorescent Tetrahedral Zinc (II) Complexes Derived from 4-Phenyl-1-octyl-1H-imidazole Fused with Aryl-9H-Carbazole and Triarylamine Donor Units: Synthesis, Crystal Structures, and Photophysical Properties
Source: MDPI journal article supplement (doi:10.3390/ijms241512260), 2023-07-31
Supplement: s1 [file s1]

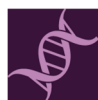

Article supplementary information

# Novel Fluorescent Tetrahedral Zinc (II) complexes derived from 4-Phenyl-1-octyl-1*H*-imidazole Fused with Aryl-9*H*-carbazole and Triarylamine Donor Units: Synthesis, Crystal Structures, and Photophysical Properties

Thompho Jason Rashamuse <sup>1\*</sup>, Elena Mabel Coyanis <sup>1</sup>, Rudolph Erasmus <sup>2</sup>, Nomampondo Penelope Magwa <sup>3</sup>

<sup>1</sup> Nanotechnology Innovation Centre, Health Platform, Advanced Materials Division, Mintek, Private Bag X3015, Randburg, 2125, South Africa; [jasonr@mintek.co.za](mailto:jasonr@mintek.co.za) (T.J.R.) and [mabelc@mintek.co.za](mailto:mabelc@mintek.co.za) (E.M.C)

<sup>2</sup> Materials for Energy Research group, Material Physics Research Institute, School of Physics, University of the Witwatersrand, Private Bag 3, Wits, 2050 Johannesburg, South Africa; [Rudolph.Erasmus@wits.ac.za](mailto:Rudolph.Erasmus@wits.ac.za) (R.E)

<sup>3</sup> Department of chemistry, University of South Africa, Private Bag X6, Florida, Roodepoort, Gauteng, 1710, South Africa; [magwanp@unisa.ac.za](mailto:magwanp@unisa.ac.za) (N.P.M)

\* Correspondence: [jasonr@mintek.co.za](mailto:jasonr@mintek.co.za); Tel.: (+27117094492)

## Table of contents

|                                                                                                                                                            |    |
|------------------------------------------------------------------------------------------------------------------------------------------------------------|----|
| 1. NMR spectra of ligands and their correspoing Zn (II) complexes -----                                                                                    | 2  |
| 2. FTIR spectra of the synthesised free ligands and their corresponding Zn (II) complexes -----                                                            | 6  |
| 3. Single crystal X-ray diffraction full data set of 4'-(1-octyl-1 <i>H</i> -imidazol-4-yl)- <i>N,N</i> -diphenyl-[1,1'-biphenyl]-4-yl)-4-amine ImL1 ----- | 8  |
| 4. Single crystal X-ray diffraction full date set of 9-(4'-(1-octyl-1 <i>H</i> -imidazol-4-yl)-[1,1'-biphenyl]-4-yl)-9 <i>H</i> -carbazole ImL2 -----      | 19 |
| 5. Single crystal X-ray diffraction full date set of ZnCl <sub>2</sub> (ImL1) <sub>2</sub> complex-----                                                    | 30 |
| 6. Fluorescence decay curves -----                                                                                                                         | 51 |

## 1. NMR spectra of ligands and their corresponding Zn (II) complexes

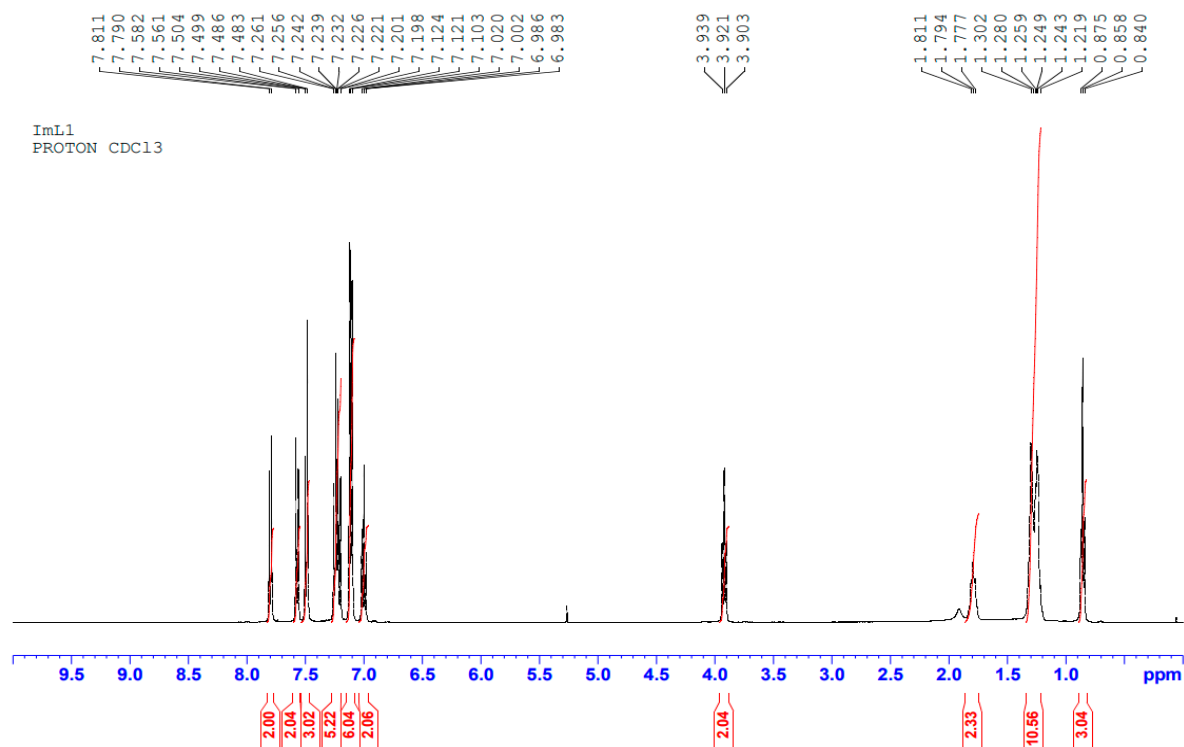

Figure S1. Proton NMR spectrum of 4'-(1-octyl-1*H*-imidazol-4-yl)-*N,N*-diphenyl-[1,1'-biphenyl]-4-yl)-4-amine **ImL1** in CDCl<sub>3</sub>.

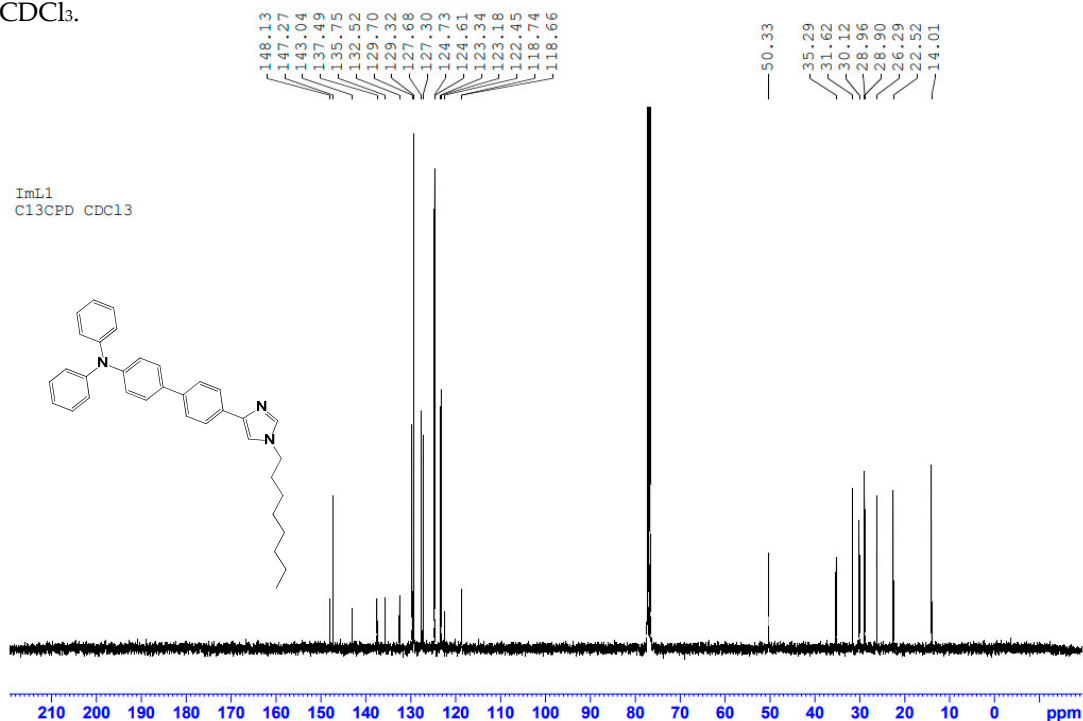

Figure S2. <sup>13</sup>C NMR spectrum of 4'-(1-octyl-1*H*-imidazol-4-yl)-*N,N*-diphenyl-[1,1'-biphenyl]-4-yl)-4-amine **ImL1** (CDCl<sub>3</sub>, 101 MHz).

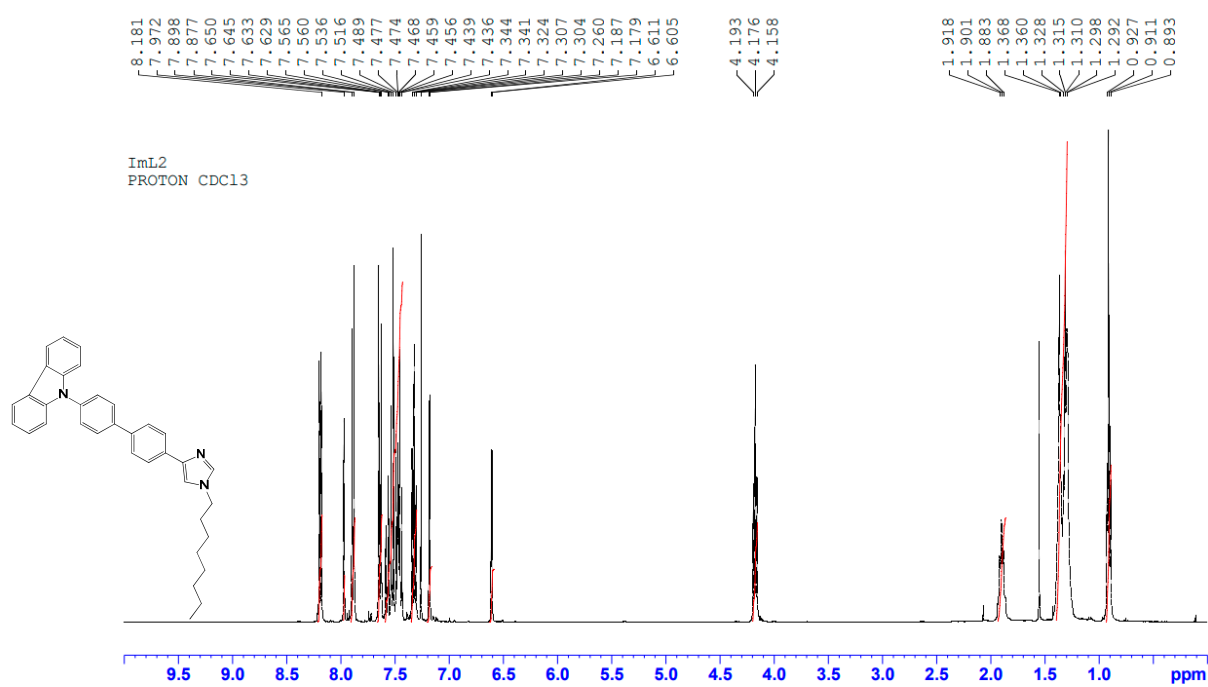

Figure S3. <sup>1</sup>H NMR spectrum of 9-(4'-(1-octyl-1H-imidazol-4-yl)-[1,1'-biphenyl]-4-yl)-9H-carbazole **ImL2** (CDCl<sub>3</sub>, 400 MHz).

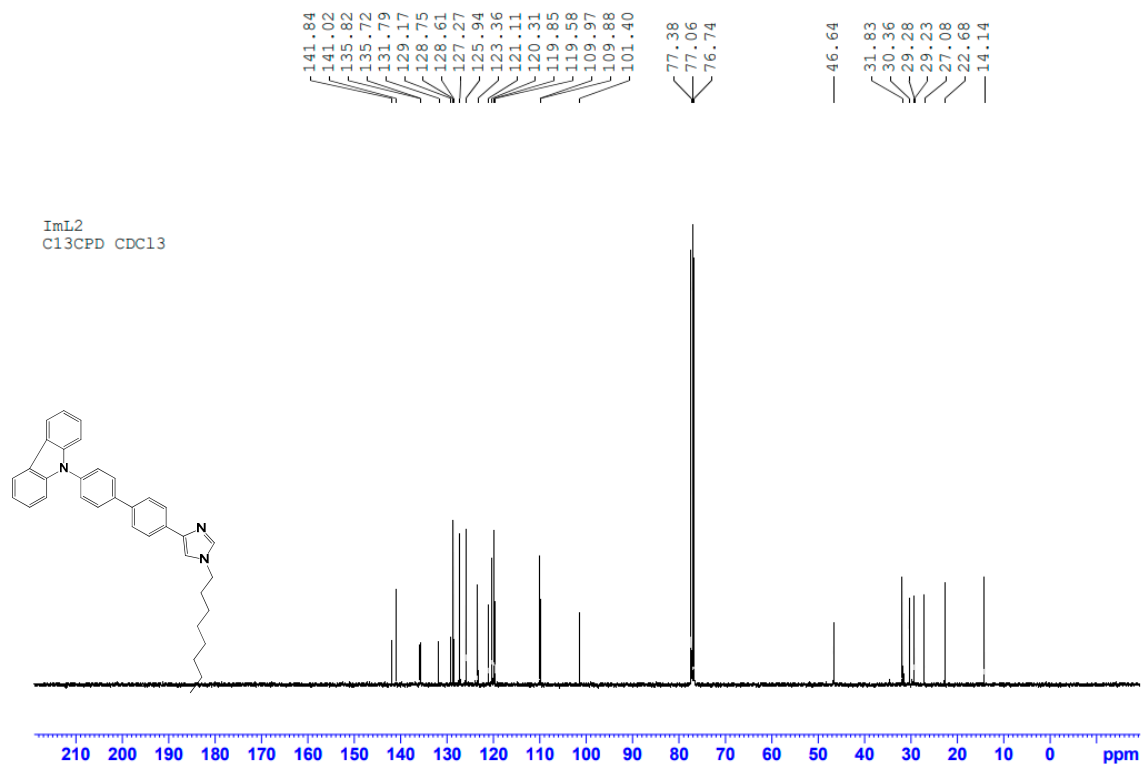

Figure S4. <sup>13</sup>C NMR spectrum of 9-(4'-(1-octyl-1H-imidazol-4-yl)-[1,1'-biphenyl]-4-yl)-9H-carbazole **ImL2** (CDCl<sub>3</sub>, 101 MHz).

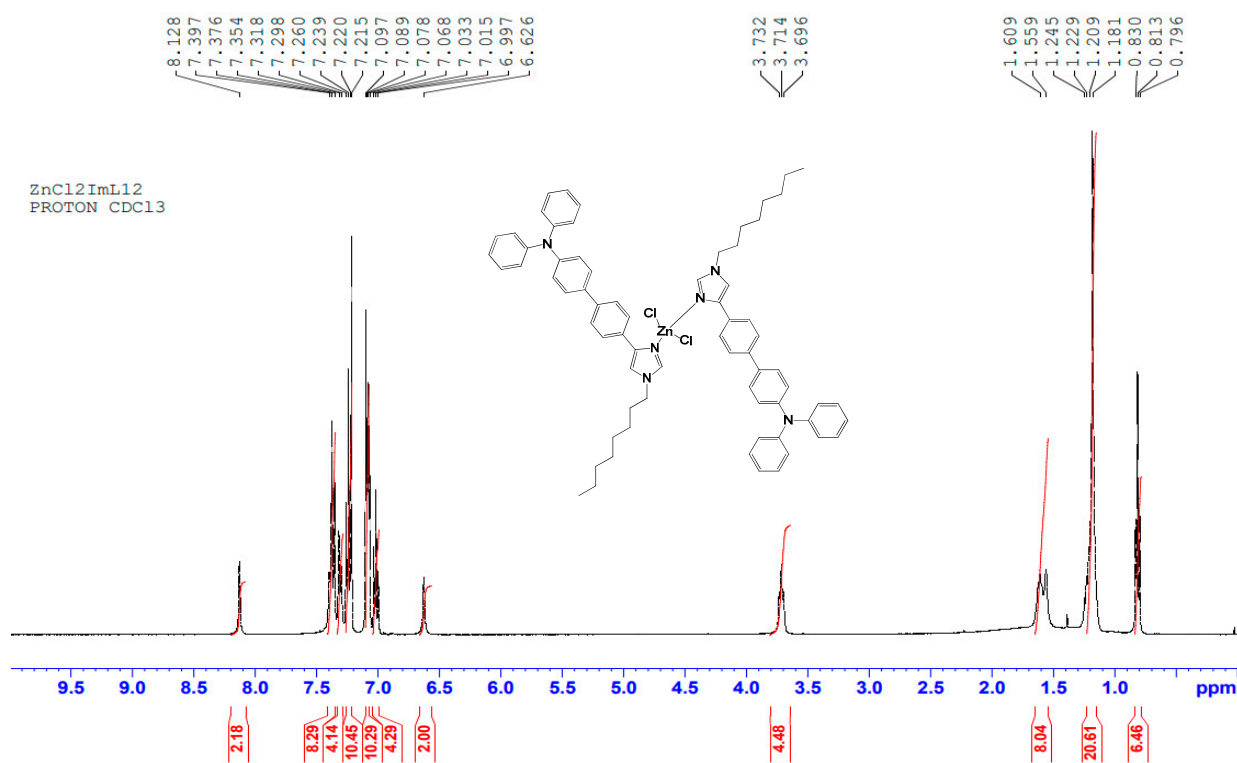Figure S5. Proton NMR spectrum of **ZnCl<sub>2</sub>(ImL1)<sub>2</sub>** in CDCl<sub>3</sub>.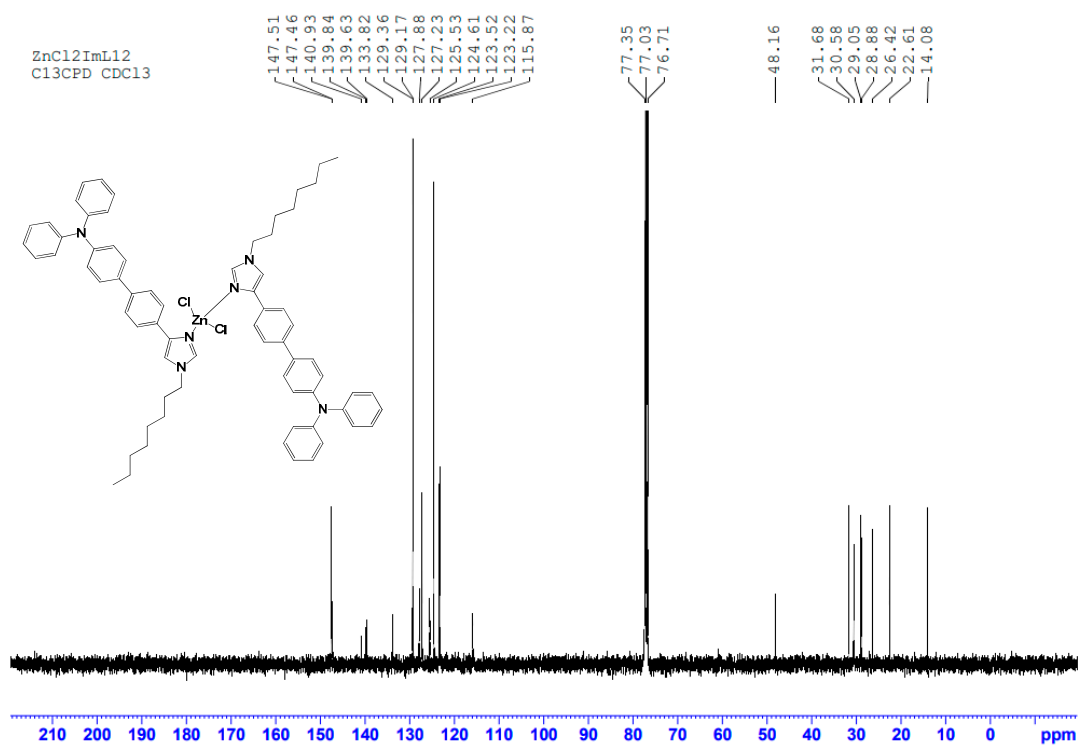Figure S6. <sup>13</sup>C NMR spectrum of **ZnCl<sub>2</sub>(ImL1)<sub>2</sub>** complex (CDCl<sub>3</sub>, 101 MHz).

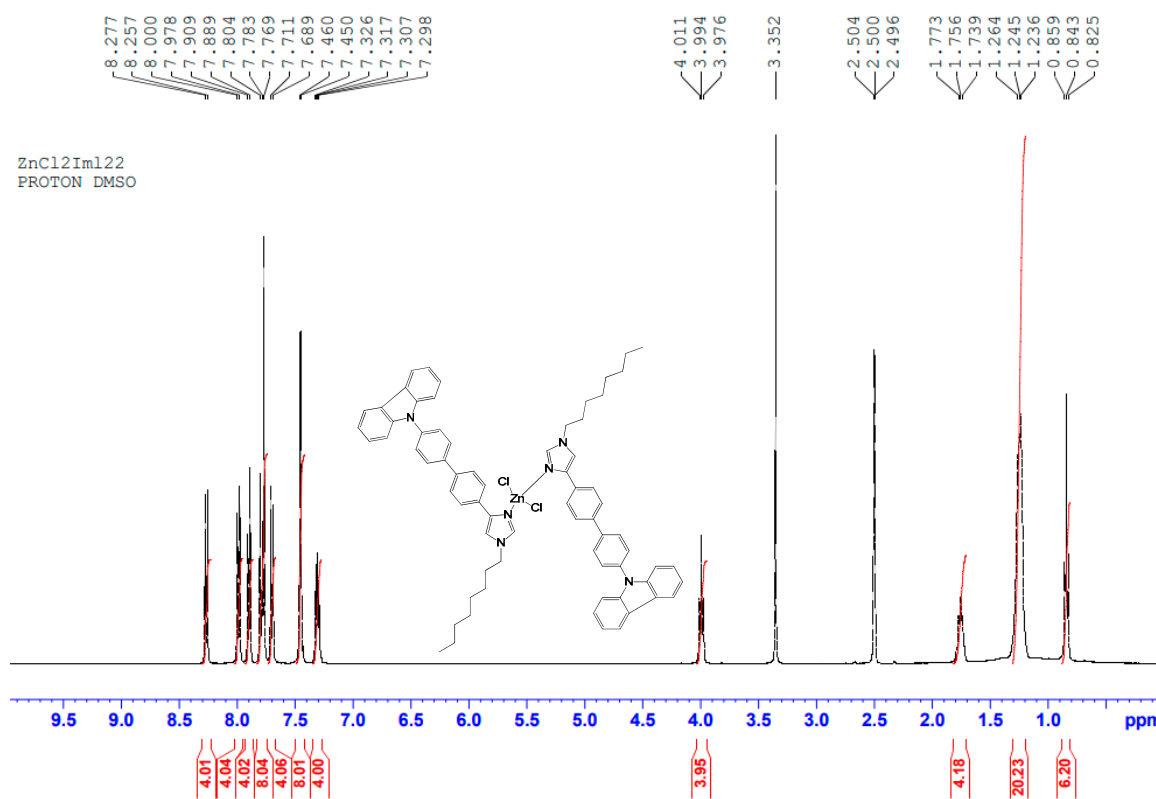Figure S7. <sup>1</sup>H NMR spectrum of **ZnCl<sub>2</sub>(ImL2)<sub>2</sub>** complex (DMSO-*d*<sub>6</sub>, 400 MHz).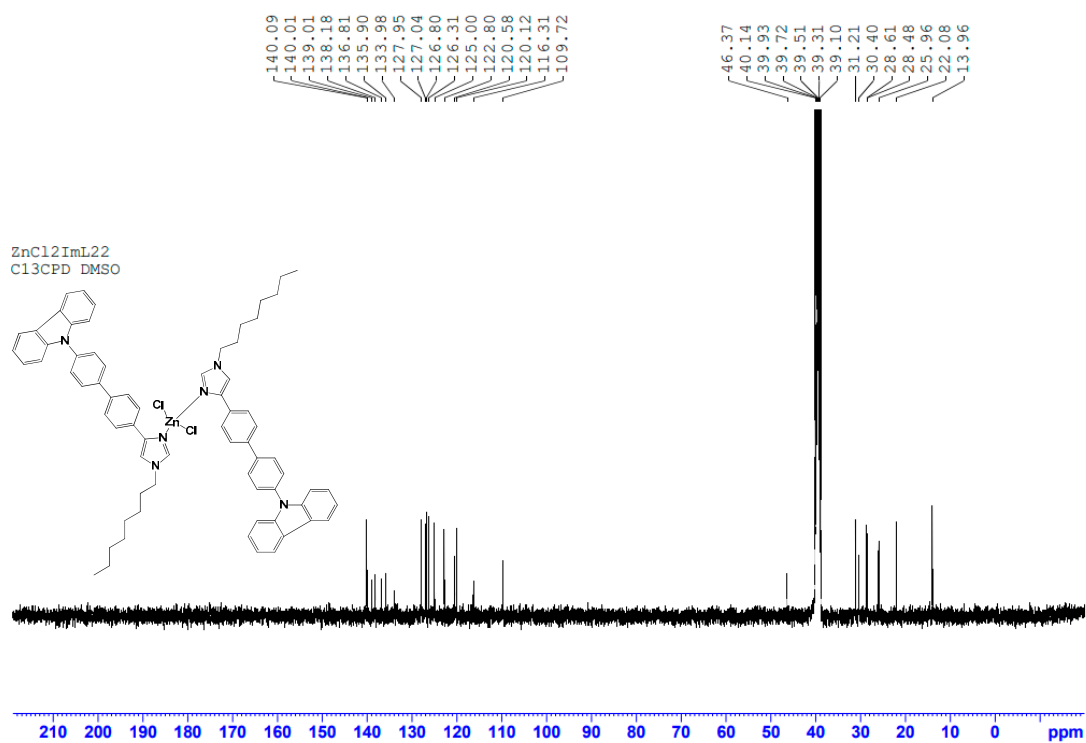Figure S8. <sup>13</sup>C NMR spectrum of **ZnCl<sub>2</sub>(ImL2)<sub>2</sub>** complex (DMSO-*d*<sub>6</sub>, 101 MHz).

## 2. FTIR spectra of the synthesised free ligands and their corresponding Zn (II) complexes

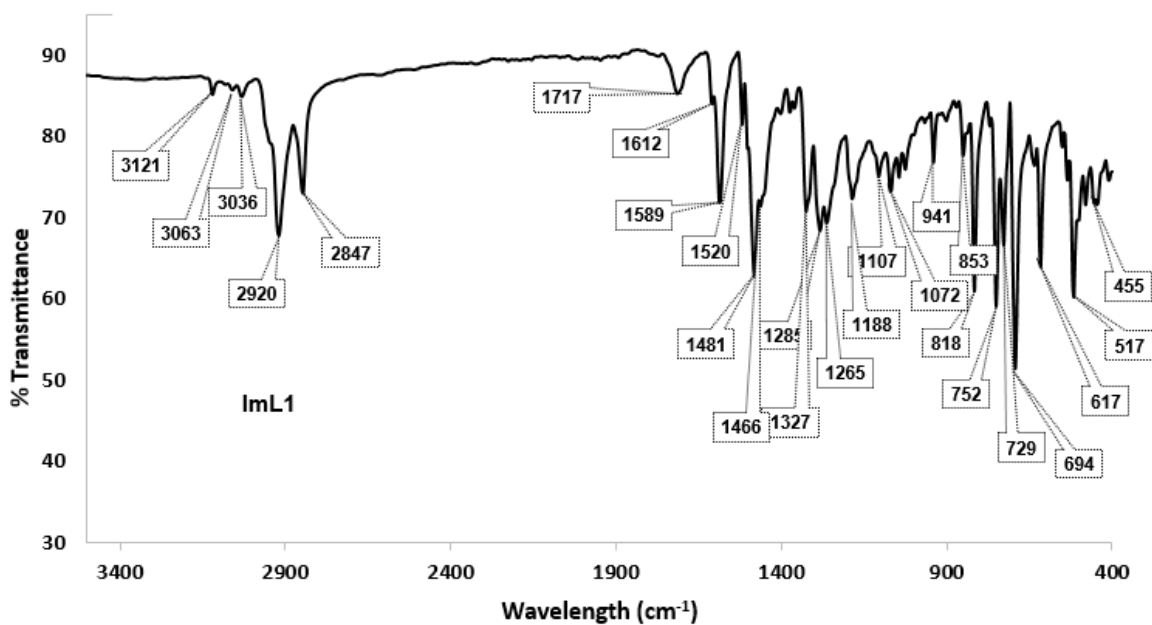Figure S9. FTIR spectrum of the free ligand **ImL1**.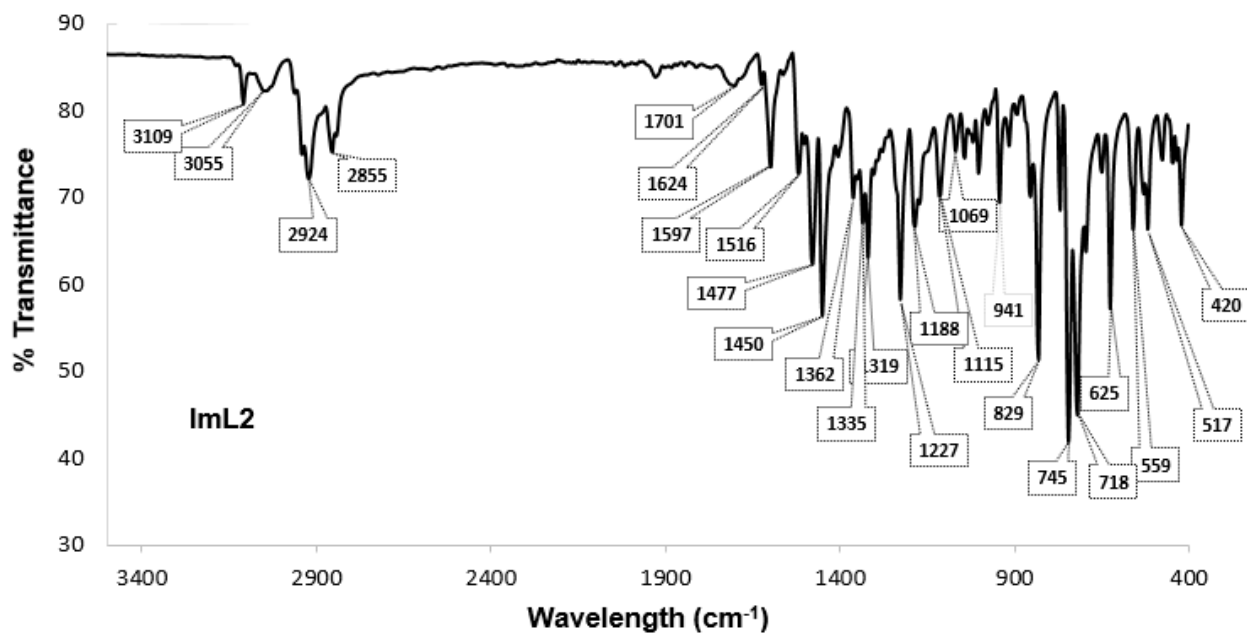Figure S10. FTIR spectrum of the free ligand **ImL2**.

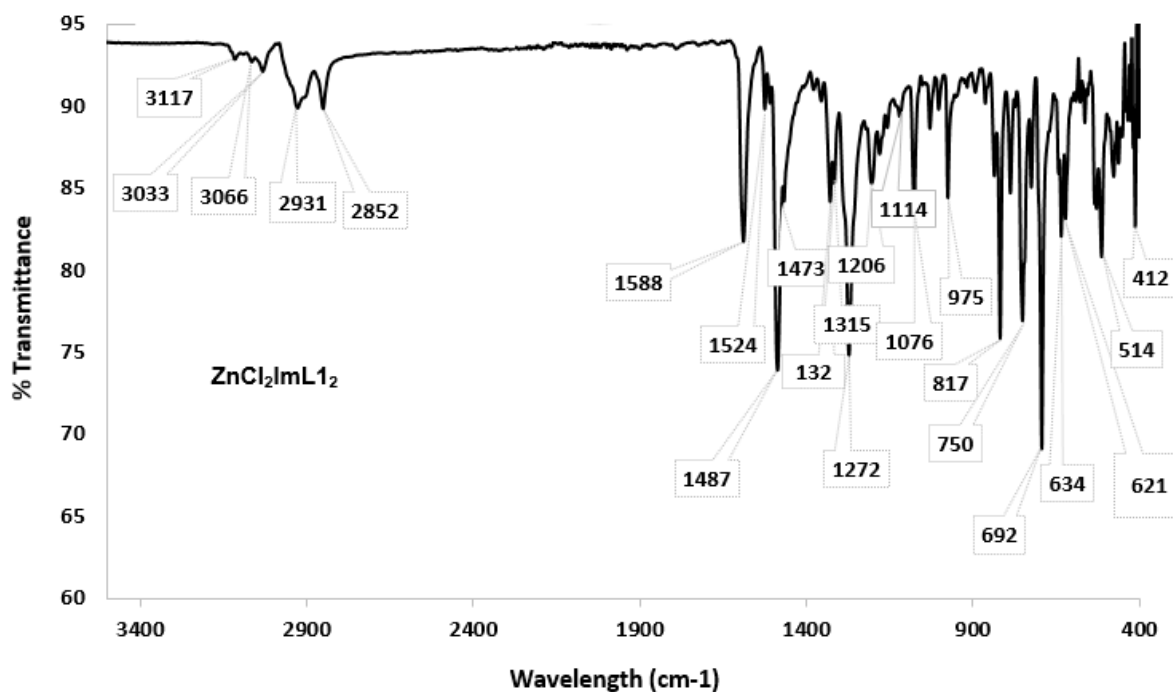Figure S11. FTIR spectrum of the Zn (II) complex  $\text{ZnCl}_2(\text{ImL1})_2$ .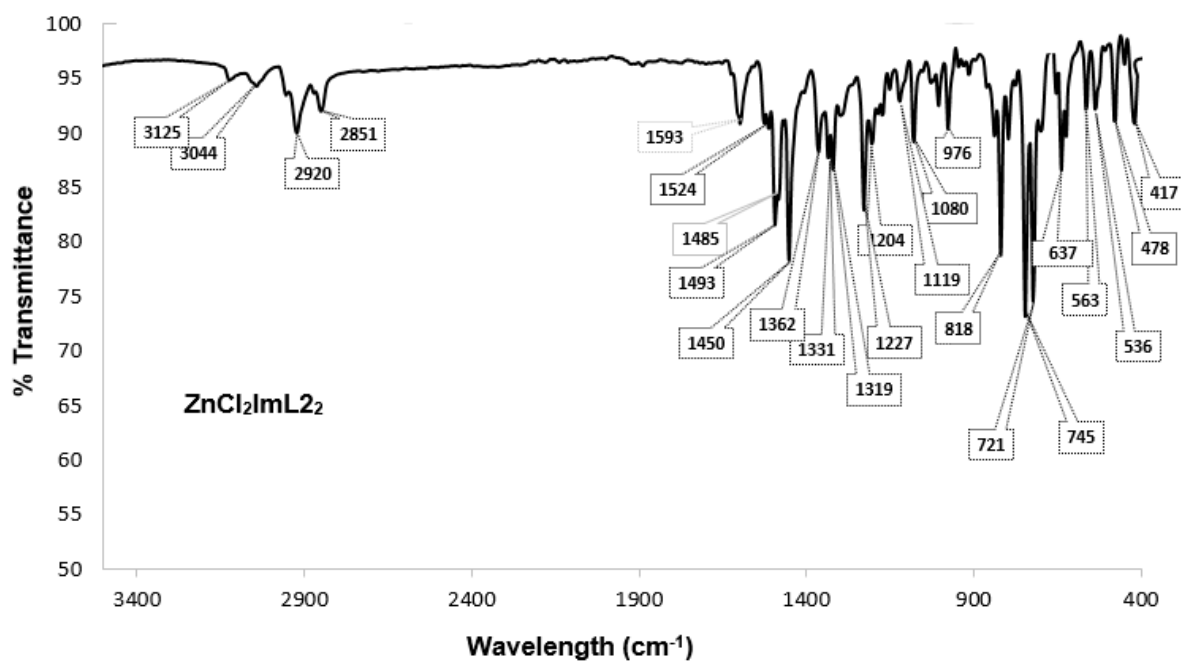Figure S12. FTIR spectrum of the Zn (II) complex  $\text{ZnCl}_2(\text{ImL2})_2$ .

### 3. Single crystal X-ray diffraction full data set of 4'-(1-octyl-1H-imidazol-4-yl)-*N,N*-diphenyl-[1,1'-biphenyl]-4-yl)-4-amine ImL1

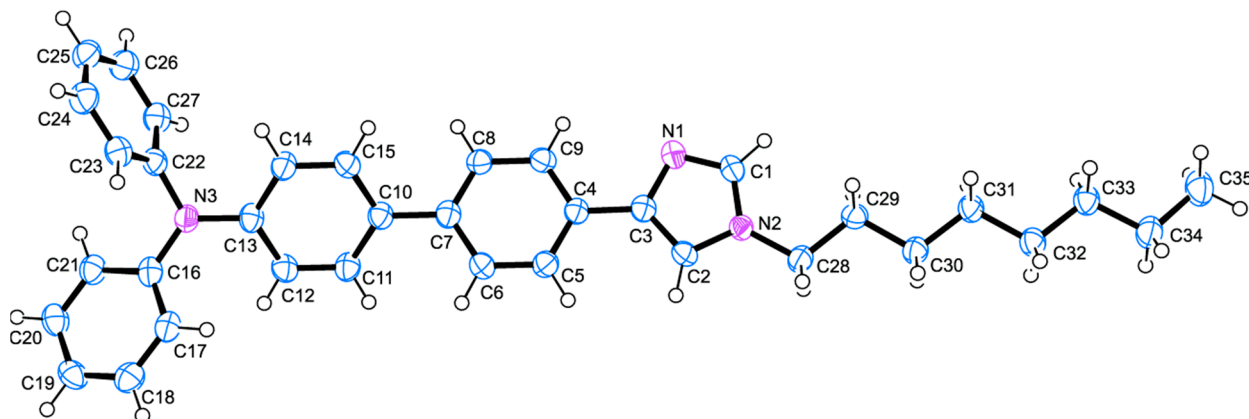

Figure 3 from the main text. Perspective view of **ImL1** (showing the atom-numbering scheme. Displacement ellipsoids are drawn at the 50% probability level and H atoms are shown as small spheres of arbitrary radii.

**Table S1.** Atomic coordinates ( $\times 10^4$ ) and equivalent isotropic displacement parameters ( $\text{\AA}^2 \times 10^3$ ) for **ImL1**.

| C(1)                                                                                                                                                                                                                                                                                                                    | 6173(6) | 1576(4)  | 5038(1) |
|-------------------------------------------------------------------------------------------------------------------------------------------------------------------------------------------------------------------------------------------------------------------------------------------------------------------------|---------|----------|---------|
|                                                                                                                                                                                                                                      |         |          |         |
| Copyright: © 2023 by the authors. Licensee MDPI, Basel, Switzerland. This article is an open access article distributed under the terms and conditions of the Creative Commons Attribution (CC BY) license ( <a href="https://creativecommons.org/licenses/by/4.0/">https://creativecommons.org/licenses/by/4.0/</a> ). |         |          |         |
| C(2)                                                                                                                                                                                                                                                                                                                    | 7374(5) | 3832(4)  | 4717(1) |
| C(3)                                                                                                                                                                                                                                                                                                                    | 5560(5) | 3572(4)  | 4476(1) |
| C(4)                                                                                                                                                                                                                                                                                                                    | 4481(5) | 4553(4)  | 4051(1) |
| C(5)                                                                                                                                                                                                                                                                                                                    | 5349(6) | 5939(4)  | 3816(1) |
| C(6)                                                                                                                                                                                                                                                                                                                    | 4383(6) | 6832(4)  | 3399(1) |
| C(7)                                                                                                                                                                                                                                                                                                                    | 2517(5) | 6365(4)  | 3203(1) |
| C(8)                                                                                                                                                                                                                                                                                                                    | 1630(5) | 4990(4)  | 3443(1) |
| C(9)                                                                                                                                                                                                                                                                                                                    | 2602(5) | 4091(4)  | 3861(1) |
| C(10)                                                                                                                                                                                                                                                                                                                   | 1544(5) | 7296(4)  | 2744(1) |
| C(11)                                                                                                                                                                                                                                                                                                                   | 1576(6) | 8897(4)  | 2649(1) |
| C(12)                                                                                                                                                                                                                                                                                                                   | 685(6)  | 9757(4)  | 2219(1) |
| C(13)                                                                                                                                                                                                                                                                                                                   | -205(5) | 9025(4)  | 1845(1) |
| C(14)                                                                                                                                                                                                                                                                                                                   | -252(6) | 7428(4)  | 1936(1) |
| C(15)                                                                                                                                                                                                                                                                                                                   | 574(6)  | 6580(4)  | 2378(1) |
| C(16)                                                                                                                                                                                                                                                                                                                   | -532(5) | 11399(4) | 1180(1) |
| C(17)                                                                                                                                                                                                                                                                                                                   | 1502(6) | 12015(4) | 1213(1) |



|       |          |          |         |
|-------|----------|----------|---------|
| C(18) | 1891(6)  | 13526(4) | 999(1)  |
| C(19) | 303(6)   | 14453(4) | 741(1)  |
| C(20) | -1696(6) | 13838(4) | 696(1)  |
| C(21) | -2125(6) | 12345(4) | 912(1)  |
| C(22) | -2340(5) | 9084(4)  | 1081(1) |
| C(23) | -1527(6) | 8914(4)  | 569(1)  |
| C(24) | -2789(6) | 8242(4)  | 254(1)  |
| C(25) | -4836(6) | 7712(4)  | 445(1)  |
| C(26) | -5622(6) | 7844(4)  | 958(1)  |
| C(27) | -4385(5) | 8538(4)  | 1273(1) |
| C(28) | 9516(5)  | 2310(4)  | 5434(1) |
| C(29) | 9570(5)  | 721(4)   | 5753(1) |
| C(30) | 11421(5) | 517(4)   | 6120(1) |
| C(31) | 11526(6) | -1077(4) | 6442(1) |
| C(32) | 13315(6) | -1284(4) | 6826(1) |
| C(33) | 13194(6) | -2804(4) | 7191(1) |
| C(34) | 14866(6) | -3033(4) | 7604(1) |
| C(35) | 14535(7) | -4530(5) | 7974(2) |
| N(1)  | 4787(5)  | 2137(3)  | 4680(1) |
| N(2)  | 7747(4)  | 2547(3)  | 5073(1) |
| N(3)  | -1039(5) | 9865(3)  | 1387(1) |

**Table S2.** Bond lengths [Å] and angles [°] for **ImL1**.

| Bond lengths [Å] |          |
|------------------|----------|
| C(1)-N(1)        | 1.328(4) |
| C(1)-N(2)        | 1.337(4) |
| C(1)-H(1)        | 0.95     |
| C(2)-C(3)        | 1.361(5) |
| C(2)-N(2)        | 1.368(4) |
| C(2)-H(2)        | 0.95     |
| C(3)-N(1)        | 1.384(4) |
| C(3)-C(4)        | 1.470(4) |
| C(4)-C(9)        | 1.386(4) |
| C(4)-C(5)        | 1.389(5) |
| C(5)-C(6)        | 1.388(5) |
| C(5)-H(5)        | 0.95     |
| C(6)-C(7)        | 1.389(5) |
| C(6)-H(6)        | 0.95     |
| C(7)-C(8)        | 1.389(5) |
| C(7)-C(10)       | 1.486(4) |
| C(8)-C(9)        | 1.395(4) |

|              |          |
|--------------|----------|
| C(8)-H(8)    | 0.95     |
| C(9)-H(9)    | 0.95     |
| C(10)-C(11)  | 1.391(5) |
| C(10)-C(15)  | 1.398(5) |
| C(11)-C(12)  | 1.382(5) |
| C(11)-H(11)  | 0.95     |
| C(12)-C(13)  | 1.398(5) |
| C(12)-H(12)  | 0.95     |
| C(13)-C(14)  | 1.388(5) |
| C(13)-N(3)   | 1.418(4) |
| C(14)-C(15)  | 1.385(5) |
| C(14)-H(14)  | 0.95     |
| C(15)-H(15)  | 0.95     |
| C(16)-C(17)  | 1.393(5) |
| C(16)-C(21)  | 1.400(4) |
| C(16)-N(3)   | 1.414(4) |
| C(17)-C(18)  | 1.384(5) |
| C(17)-H(17)  | 0.95     |
| C(18)-C(19)  | 1.378(5) |
| C(18)-H(18)  | 0.95     |
| C(19)-C(20)  | 1.379(5) |
| C(19)-H(19)  | 0.95     |
| C(20)-C(21)  | 1.378(5) |
| C(20)-H(20)  | 0.95     |
| C(21)-H(21)  | 0.95     |
| C(22)-C(27)  | 1.382(5) |
| C(22)-C(23)  | 1.396(5) |
| C(22)-N(3)   | 1.434(4) |
| C(23)-C(24)  | 1.380(5) |
| C(23)-H(23)  | 0.95     |
| C(24)-C(25)  | 1.379(5) |
| C(24)-H(24)  | 0.95     |
| C(25)-C(26)  | 1.385(5) |
| C(25)-H(25)  | 0.95     |
| C(26)-C(27)  | 1.381(5) |
| C(26)-H(26)  | 0.95     |
| C(27)-H(27)  | 0.95     |
| C(28)-N(2)   | 1.471(4) |
| C(28)-C(29)  | 1.511(4) |
| C(28)-H(28A) | 0.99     |
| C(28)-H(28B) | 0.99     |

|                        |          |
|------------------------|----------|
| C(29)-C(30)            | 1.521(4) |
| C(29)-H(29A)           | 0.99     |
| C(29)-H(29B)           | 0.99     |
| C(30)-C(31)            | 1.520(4) |
| C(30)-H(30A)           | 0.99     |
| C(30)-H(30B)           | 0.99     |
| C(31)-C(32)            | 1.521(4) |
| C(31)-H(31A)           | 0.99     |
| C(31)-H(31B)           | 0.99     |
| C(32)-C(33)            | 1.517(5) |
| C(32)-H(32A)           | 0.99     |
| C(32)-H(32B)           | 0.99     |
| C(33)-C(34)            | 1.524(5) |
| C(33)-H(33A)           | 0.99     |
| C(33)-H(33B)           | 0.99     |
| C(34)-C(35)            | 1.519(5) |
| C(34)-H(34A)           | 0.99     |
| C(34)-H(34B)           | 0.99     |
| C(35)-H(35A)           | 0.98     |
| C(35)-H(35B)           | 0.98     |
| C(35)-H(35C)           | 0.98     |
| <b>Bond angles [°]</b> |          |
| N(1)-C(1)-N(2)         | 112.6(3) |
| N(1)-C(1)-H(1)         | 123.7    |
| N(2)-C(1)-H(1)         | 123.7    |
| C(3)-C(2)-N(2)         | 106.4(3) |
| C(3)-C(2)-H(2)         | 126.8    |
| N(2)-C(2)-H(2)         | 126.8    |
| C(2)-C(3)-N(1)         | 109.8(3) |
| C(2)-C(3)-C(4)         | 129.3(3) |
| N(1)-C(3)-C(4)         | 120.9(3) |
| C(9)-C(4)-C(5)         | 118.1(3) |
| C(9)-C(4)-C(3)         | 120.6(3) |
| C(5)-C(4)-C(3)         | 121.3(3) |
| C(6)-C(5)-C(4)         | 121.2(3) |
| C(6)-C(5)-H(5)         | 119.4    |
| C(4)-C(5)-H(5)         | 119.4    |
| C(5)-C(6)-C(7)         | 121.0(3) |
| C(5)-C(6)-H(6)         | 119.5    |
| C(7)-C(6)-H(6)         | 119.5    |
| C(6)-C(7)-C(8)         | 117.8(3) |

|                   |          |
|-------------------|----------|
| C(6)-C(7)-C(10)   | 120.7(3) |
| C(8)-C(7)-C(10)   | 121.5(3) |
| C(7)-C(8)-C(9)    | 121.3(3) |
| C(7)-C(8)-H(8)    | 119.4    |
| C(9)-C(8)-H(8)    | 119.4    |
| C(4)-C(9)-C(8)    | 120.7(3) |
| C(4)-C(9)-H(9)    | 119.7    |
| C(8)-C(9)-H(9)    | 119.7    |
| C(11)-C(10)-C(15) | 116.7(3) |
| C(11)-C(10)-C(7)  | 122.6(3) |
| C(15)-C(10)-C(7)  | 120.7(3) |
| C(12)-C(11)-C(10) | 122.4(3) |
| C(12)-C(11)-H(11) | 118.8    |
| C(10)-C(11)-H(11) | 118.8    |
| C(11)-C(12)-C(13) | 120.4(3) |
| C(11)-C(12)-H(12) | 119.8    |
| C(13)-C(12)-H(12) | 119.8    |
| C(14)-C(13)-C(12) | 117.7(3) |
| C(14)-C(13)-N(3)  | 120.4(3) |
| C(12)-C(13)-N(3)  | 121.9(3) |
| C(15)-C(14)-C(13) | 121.5(3) |
| C(15)-C(14)-H(14) | 119.3    |
| C(13)-C(14)-H(14) | 119.3    |
| C(14)-C(15)-C(10) | 121.3(3) |
| C(14)-C(15)-H(15) | 119.3    |
| C(10)-C(15)-H(15) | 119.3    |
| C(17)-C(16)-C(21) | 117.6(3) |
| C(17)-C(16)-N(3)  | 123.7(3) |
| C(21)-C(16)-N(3)  | 118.7(3) |
| C(18)-C(17)-C(16) | 120.6(3) |
| C(18)-C(17)-H(17) | 119.7    |
| C(16)-C(17)-H(17) | 119.7    |
| C(19)-C(18)-C(17) | 121.3(4) |
| C(19)-C(18)-H(18) | 119.4    |
| C(17)-C(18)-H(18) | 119.4    |
| C(18)-C(19)-C(20) | 118.4(3) |
| C(18)-C(19)-H(19) | 120.8    |
| C(20)-C(19)-H(19) | 120.8    |
| C(21)-C(20)-C(19) | 121.1(3) |
| C(21)-C(20)-H(20) | 119.4    |
| C(19)-C(20)-H(20) | 119.4    |

|                     |          |
|---------------------|----------|
| C(20)-C(21)-C(16)   | 120.9(3) |
| C(20)-C(21)-H(21)   | 119.6    |
| C(16)-C(21)-H(21)   | 119.6    |
| C(27)-C(22)-C(23)   | 119.6(3) |
| C(27)-C(22)-N(3)    | 122.0(3) |
| C(23)-C(22)-N(3)    | 118.4(3) |
| C(24)-C(23)-C(22)   | 119.9(3) |
| C(24)-C(23)-H(23)   | 120      |
| C(22)-C(23)-H(23)   | 120      |
| C(25)-C(24)-C(23)   | 120.3(3) |
| C(25)-C(24)-H(24)   | 119.8    |
| C(23)-C(24)-H(24)   | 119.8    |
| C(24)-C(25)-C(26)   | 119.9(3) |
| C(24)-C(25)-H(25)   | 120.1    |
| C(26)-C(25)-H(25)   | 120.1    |
| C(27)-C(26)-C(25)   | 120.2(3) |
| C(27)-C(26)-H(26)   | 119.9    |
| C(25)-C(26)-H(26)   | 119.9    |
| C(26)-C(27)-C(22)   | 120.1(3) |
| C(26)-C(27)-H(27)   | 119.9    |
| C(22)-C(27)-H(27)   | 119.9    |
| N(2)-C(28)-C(29)    | 113.0(3) |
| N(2)-C(28)-H(28A)   | 109      |
| C(29)-C(28)-H(28A)  | 109      |
| N(2)-C(28)-H(28B)   | 109      |
| C(29)-C(28)-H(28B)  | 109      |
| H(28A)-C(28)-H(28B) | 107.8    |
| C(28)-C(29)-C(30)   | 111.5(3) |
| C(28)-C(29)-H(29A)  | 109.3    |
| C(30)-C(29)-H(29A)  | 109.3    |
| C(28)-C(29)-H(29B)  | 109.3    |
| C(30)-C(29)-H(29B)  | 109.3    |
| H(29A)-C(29)-H(29B) | 108      |
| C(31)-C(30)-C(29)   | 112.7(3) |
| C(31)-C(30)-H(30A)  | 109.1    |
| C(29)-C(30)-H(30A)  | 109.1    |
| C(31)-C(30)-H(30B)  | 109.1    |
| C(29)-C(30)-H(30B)  | 109.1    |
| H(30A)-C(30)-H(30B) | 107.8    |
| C(30)-C(31)-C(32)   | 113.4(3) |
| C(30)-C(31)-H(31A)  | 108.9    |

|                     |          |
|---------------------|----------|
| C(32)-C(31)-H(31A)  | 108.9    |
| C(30)-C(31)-H(31B)  | 108.9    |
| C(32)-C(31)-H(31B)  | 108.9    |
| H(31A)-C(31)-H(31B) | 107.7    |
| C(33)-C(32)-C(31)   | 112.3(3) |
| C(33)-C(32)-H(32A)  | 109.1    |
| C(31)-C(32)-H(32A)  | 109.1    |
| C(33)-C(32)-H(32B)  | 109.1    |
| C(31)-C(32)-H(32B)  | 109.1    |
| H(32A)-C(32)-H(32B) | 107.9    |
| C(32)-C(33)-C(34)   | 114.6(3) |
| C(32)-C(33)-H(33A)  | 108.6    |
| C(34)-C(33)-H(33A)  | 108.6    |
| C(32)-C(33)-H(33B)  | 108.6    |
| C(34)-C(33)-H(33B)  | 108.6    |
| H(33A)-C(33)-H(33B) | 107.6    |
| C(35)-C(34)-C(33)   | 111.2(3) |
| C(35)-C(34)-H(34A)  | 109.4    |
| C(33)-C(34)-H(34A)  | 109.4    |
| C(35)-C(34)-H(34B)  | 109.4    |
| C(33)-C(34)-H(34B)  | 109.4    |
| H(34A)-C(34)-H(34B) | 108      |
| C(34)-C(35)-H(35A)  | 109.5    |
| C(34)-C(35)-H(35B)  | 109.5    |
| H(35A)-C(35)-H(35B) | 109.5    |
| C(34)-C(35)-H(35C)  | 109.5    |
| H(35A)-C(35)-H(35C) | 109.5    |
| H(35B)-C(35)-H(35C) | 109.5    |
| C(1)-N(1)-C(3)      | 104.3(3) |
| C(1)-N(2)-C(2)      | 106.9(3) |
| C(1)-N(2)-C(28)     | 127.0(3) |
| C(2)-N(2)-C(28)     | 126.1(3) |
| C(16)-N(3)-C(13)    | 124.7(3) |
| C(16)-N(3)-C(22)    | 116.6(3) |
| C(13)-N(3)-C(22)    | 118.5(3) |

**Table S3.** Anisotropic displacement parameters ( $\text{\AA}^2 \times 10^3$ ) for **ImL1**.

| U <sup>11</sup> | U <sup>22</sup> | U <sup>33</sup> | U <sup>23</sup> | U <sup>13</sup> | U <sup>12</sup> |
|-----------------|-----------------|-----------------|-----------------|-----------------|-----------------|
|-----------------|-----------------|-----------------|-----------------|-----------------|-----------------|

|       |       |       |       |        |        |       |
|-------|-------|-------|-------|--------|--------|-------|
| C(1)  | 41(2) | 30(2) | 43(2) | 3(1)   | -9(2)  | -1(2) |
| C(2)  | 40(2) | 25(2) | 38(2) | -4(1)  | -5(1)  | 0(1)  |
| C(3)  | 33(2) | 31(2) | 33(2) | -9(1)  | -2(1)  | 6(1)  |
| C(4)  | 33(2) | 29(2) | 31(2) | -8(1)  | -4(1)  | 5(1)  |
| C(5)  | 40(2) | 33(2) | 41(2) | -7(1)  | -11(2) | 1(2)  |
| C(6)  | 43(2) | 29(2) | 40(2) | -2(1)  | -8(2)  | 0(1)  |
| C(7)  | 37(2) | 33(2) | 33(2) | -8(1)  | -5(1)  | 5(1)  |
| C(8)  | 35(2) | 31(2) | 38(2) | -6(1)  | -7(1)  | -1(1) |
| C(9)  | 34(2) | 29(2) | 38(2) | -5(1)  | -2(1)  | -2(1) |
| C(10) | 35(2) | 33(2) | 35(2) | -6(1)  | -5(1)  | 4(1)  |
| C(11) | 42(2) | 36(2) | 32(2) | -9(1)  | -7(1)  | 6(2)  |
| C(12) | 43(2) | 30(2) | 37(2) | -8(1)  | -4(1)  | 6(1)  |
| C(13) | 34(2) | 35(2) | 34(2) | -6(1)  | -5(1)  | 9(1)  |
| C(14) | 40(2) | 38(2) | 34(2) | -7(1)  | -8(1)  | 3(2)  |
| C(15) | 45(2) | 29(2) | 40(2) | -4(1)  | -8(2)  | 1(2)  |
| C(16) | 40(2) | 35(2) | 28(2) | -7(1)  | -4(1)  | 8(1)  |
| C(17) | 40(2) | 41(2) | 34(2) | -8(1)  | -8(1)  | 6(2)  |
| C(18) | 46(2) | 46(2) | 41(2) | -13(2) | -5(2)  | 0(2)  |
| C(19) | 57(2) | 29(2) | 42(2) | -5(2)  | -1(2)  | 1(2)  |
| C(20) | 45(2) | 37(2) | 44(2) | -3(2)  | -6(2)  | 10(2) |
| C(21) | 37(2) | 39(2) | 41(2) | -6(2)  | -7(2)  | 6(2)  |
| C(22) | 39(2) | 29(2) | 36(2) | -4(1)  | -7(1)  | 5(1)  |
| C(23) | 39(2) | 37(2) | 38(2) | -4(1)  | -1(1)  | 5(2)  |
| C(24) | 56(2) | 45(2) | 35(2) | -10(2) | -4(2)  | 2(2)  |
| C(25) | 52(2) | 40(2) | 45(2) | -11(2) | -15(2) | 2(2)  |
| C(26) | 35(2) | 45(2) | 51(2) | -6(2)  | -7(2)  | 1(2)  |
| C(27) | 35(2) | 39(2) | 41(2) | -6(2)  | -3(1)  | 7(2)  |
| C(28) | 34(2) | 37(2) | 37(2) | -7(1)  | -9(1)  | 1(1)  |
| C(29) | 35(2) | 31(2) | 39(2) | -8(1)  | -5(1)  | -1(1) |
| C(30) | 34(2) | 36(2) | 36(2) | -6(1)  | -6(1)  | 2(1)  |

|       |       |       |       |       |        |      |
|-------|-------|-------|-------|-------|--------|------|
| C(31) | 38(2) | 33(2) | 39(2) | -8(1) | -8(1)  | 5(1) |
| C(32) | 39(2) | 35(2) | 40(2) | -7(1) | -7(1)  | 5(2) |
| C(33) | 43(2) | 37(2) | 38(2) | -8(2) | -8(2)  | 7(2) |
| C(34) | 51(2) | 46(2) | 43(2) | -8(2) | -16(2) | 6(2) |
| C(35) | 71(3) | 51(2) | 41(2) | -6(2) | -16(2) | 9(2) |
| N(1)  | 42(2) | 35(2) | 44(2) | 2(1)  | -12(1) | 0(1) |
| N(2)  | 33(1) | 28(1) | 34(1) | -5(1) | -6(1)  | 3(1) |
| N(3)  | 41(2) | 33(2) | 34(1) | -4(1) | -10(1) | 2(1) |

**Table S4.** Hydrogen coordinates ( $\times 10^4$ ) and isotropic displacement parameters ( $\text{\AA}^2 \times 10^3$ ) for **ImL1**.

|        | y     | z     | U(eq) | x  |
|--------|-------|-------|-------|----|
| H(1)   | 6057  | 593   | 5245  | 46 |
| H(2)   | 8214  | 4729  | 4651  | 41 |
| H(5)   | 6628  | 6282  | 3942  | 45 |
| H(6)   | 5006  | 7778  | 3246  | 45 |
| H(8)   | 337   | 4657  | 3321  | 41 |
| H(9)   | 1970  | 3151  | 4017  | 41 |
| H(11)  | 2235  | 9419  | 2889  | 44 |
| H(12)  | 676   | 10852 | 2178  | 44 |
| H(14)  | -863  | 6904  | 1689  | 44 |
| H(15)  | 479   | 5490  | 2433  | 46 |
| H(17)  | 2632  | 11394 | 1384  | 46 |
| H(18)  | 3280  | 13931 | 1030  | 52 |
| H(19)  | 579   | 15490 | 597   | 52 |
| H(20)  | -2796 | 14455 | 512   | 51 |
| H(21)  | -3521 | 11951 | 879   | 47 |
| H(23)  | -106  | 9261  | 437   | 46 |
| H(24)  | -2245 | 8144  | -97   | 54 |
| H(25)  | -5706 | 7257  | 227   | 53 |
| H(26)  | -7017 | 7457  | 1093  | 53 |
| H(27)  | -4939 | 8640  | 1623  | 46 |
| H(28A) | 9304  | 3093  | 5677  | 42 |
| H(28B) | 10959 | 2468  | 5229  | 42 |
| H(29A) | 9784  | -68   | 5512  | 41 |
| H(29B) | 8134  | 560   | 5961  | 41 |
| H(30A) | 12851 | 690   | 5910  | 42 |
| H(30B) | 11197 | 1305  | 6360  | 42 |



|        |       |       |      |    |
|--------|-------|-------|------|----|
| H(31A) | 11800 | -1861 | 6201 | 44 |
| H(31B) | 10074 | -1265 | 6641 | 44 |
| H(32A) | 14784 | -1239 | 6626 | 45 |
| H(32B) | 13160 | -424  | 7038 | 45 |
| H(33A) | 13426 | -3658 | 6977 | 47 |
| H(33B) | 11687 | -2871 | 7371 | 47 |
| H(34A) | 16383 | -3051 | 7429 | 55 |
| H(34B) | 14704 | -2155 | 7809 | 55 |
| H(35A) | 13108 | -4461 | 8181 | 81 |
| H(35B) | 15728 | -4705 | 8211 | 81 |
| H(35C) | 14557 | -5389 | 7769 | 81 |

**Table S5.** Torsion angles [°] for **ImL1**.

|                         |           |
|-------------------------|-----------|
| N(2)-C(2)-C(3)-N(1)     | 0.3(3)    |
| N(2)-C(2)-C(3)-C(4)     | -178.0(3) |
| C(2)-C(3)-C(4)-C(9)     | -178.9(3) |
| N(1)-C(3)-C(4)-C(9)     | 3.0(4)    |
| C(2)-C(3)-C(4)-C(5)     | 3.3(5)    |
| N(1)-C(3)-C(4)-C(5)     | -174.8(3) |
| C(9)-C(4)-C(5)-C(6)     | -0.6(5)   |
| C(3)-C(4)-C(5)-C(6)     | 177.2(3)  |
| C(4)-C(5)-C(6)-C(7)     | -0.2(5)   |
| C(5)-C(6)-C(7)-C(8)     | 1.1(5)    |
| C(5)-C(6)-C(7)-C(10)    | -177.5(3) |
| C(6)-C(7)-C(8)-C(9)     | -1.3(5)   |
| C(10)-C(7)-C(8)-C(9)    | 177.4(3)  |
| C(5)-C(4)-C(9)-C(8)     | 0.5(5)    |
| C(3)-C(4)-C(9)-C(8)     | -177.4(3) |
| C(7)-C(8)-C(9)-C(4)     | 0.4(5)    |
| C(6)-C(7)-C(10)-C(11)   | -33.4(5)  |
| C(8)-C(7)-C(10)-C(11)   | 147.9(3)  |
| C(6)-C(7)-C(10)-C(15)   | 145.4(3)  |
| C(8)-C(7)-C(10)-C(15)   | -33.2(5)  |
| C(15)-C(10)-C(11)-C(12) | 0.5(5)    |
| C(7)-C(10)-C(11)-C(12)  | 179.4(3)  |
| C(10)-C(11)-C(12)-C(13) | -3.0(5)   |
| C(11)-C(12)-C(13)-C(14) | 3.0(5)    |
| C(11)-C(12)-C(13)-N(3)  | -177.0(3) |
| C(12)-C(13)-C(14)-C(15) | -0.7(5)   |
| N(3)-C(13)-C(14)-C(15)  | 179.3(3)  |
| C(13)-C(14)-C(15)-C(10) | -1.8(5)   |

|                         |           |
|-------------------------|-----------|
| C(11)-C(10)-C(15)-C(14) | 1.8(5)    |
| C(7)-C(10)-C(15)-C(14)  | -177.1(3) |
| C(21)-C(16)-C(17)-C(18) | 1.7(5)    |
| N(3)-C(16)-C(17)-C(18)  | 179.6(3)  |
| C(16)-C(17)-C(18)-C(19) | -1.1(5)   |
| C(17)-C(18)-C(19)-C(20) | -0.5(5)   |
| C(18)-C(19)-C(20)-C(21) | 1.3(5)    |
| C(19)-C(20)-C(21)-C(16) | -0.6(5)   |
| C(17)-C(16)-C(21)-C(20) | -0.9(5)   |
| N(3)-C(16)-C(21)-C(20)  | -178.8(3) |
| C(27)-C(22)-C(23)-C(24) | 1.7(5)    |
| N(3)-C(22)-C(23)-C(24)  | -176.5(3) |
| C(22)-C(23)-C(24)-C(25) | -1.1(5)   |
| C(23)-C(24)-C(25)-C(26) | -0.5(5)   |
| C(24)-C(25)-C(26)-C(27) | 1.5(5)    |
| C(25)-C(26)-C(27)-C(22) | -0.9(5)   |
| C(23)-C(22)-C(27)-C(26) | -0.7(5)   |
| N(3)-C(22)-C(27)-C(26)  | 177.5(3)  |
| N(2)-C(28)-C(29)-C(30)  | 179.8(3)  |
| C(28)-C(29)-C(30)-C(31) | -179.6(3) |
| C(29)-C(30)-C(31)-C(32) | -177.9(3) |
| C(30)-C(31)-C(32)-C(33) | 172.6(3)  |
| C(31)-C(32)-C(33)-C(34) | -176.7(3) |
| C(32)-C(33)-C(34)-C(35) | 176.3(3)  |
| N(2)-C(1)-N(1)-C(3)     | 0.0(4)    |
| C(2)-C(3)-N(1)-C(1)     | -0.2(4)   |
| C(4)-C(3)-N(1)-C(1)     | 178.3(3)  |
| N(1)-C(1)-N(2)-C(2)     | 0.2(4)    |
| N(1)-C(1)-N(2)-C(28)    | 178.7(3)  |
| C(3)-C(2)-N(2)-C(1)     | -0.3(3)   |
| C(3)-C(2)-N(2)-C(28)    | -178.8(3) |
| C(29)-C(28)-N(2)-C(1)   | 5.6(4)    |
| C(29)-C(28)-N(2)-C(2)   | -176.2(3) |
| C(17)-C(16)-N(3)-C(13)  | 33.1(5)   |
| C(21)-C(16)-N(3)-C(13)  | -149.0(3) |
| C(17)-C(16)-N(3)-C(22)  | -141.4(3) |
| C(21)-C(16)-N(3)-C(22)  | 36.5(4)   |
| C(14)-C(13)-N(3)-C(16)  | -161.3(3) |
| C(12)-C(13)-N(3)-C(16)  | 18.7(5)   |
| C(14)-C(13)-N(3)-C(22)  | 13.1(4)   |
| C(12)-C(13)-N(3)-C(22)  | -166.9(3) |

|                        |           |
|------------------------|-----------|
| C(27)-C(22)-N(3)-C(16) | -119.5(3) |
| C(23)-C(22)-N(3)-C(16) | 58.6(4)   |
| C(27)-C(22)-N(3)-C(13) | 65.6(4)   |
| C(23)-C(22)-N(3)-C(13) | -116.2(3) |

#### 4. Single crystal X-ray diffraction full data set of 9-(4'-(1-octyl-1*H*-imidazol-4-yl)-[1,1'-biphenyl]-4-yl)-9*H*-carbazole **ImL2**

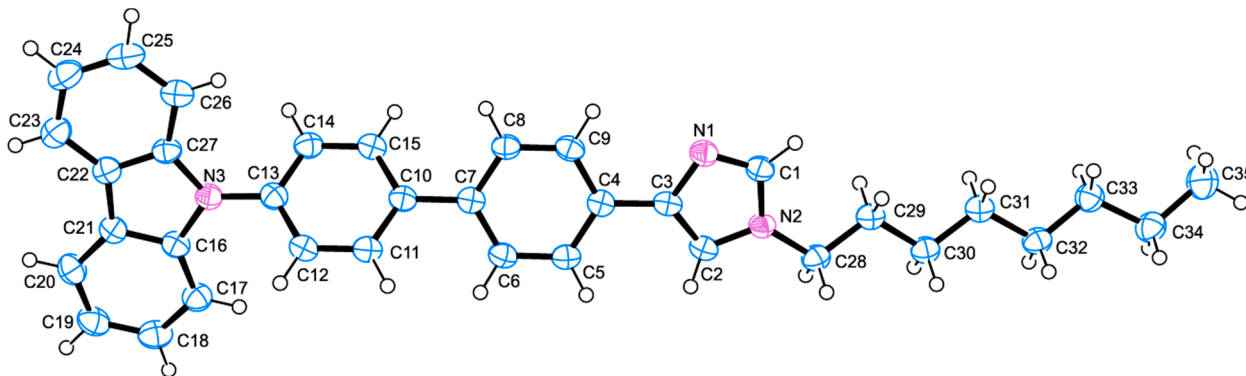

Figure 4 from the main text. Perspective view of **ImL2** showing the atom-numbering scheme. Displacement ellipsoids are drawn at the 50% probability level and H atoms are shown as small spheres of arbitrary radii.

**Table S6.** Atomic coordinates ( $\times 10^4$ ) and equivalent isotropic displacement parameters ( $\text{\AA}^2 \times 10^3$ ) for **ImL2**.

|       | x       | y        | z        | U(eq) |
|-------|---------|----------|----------|-------|
| C(1)  | 5271(1) | 6607(2)  | 4696(1)  | 36(1) |
| C(2)  | 5227(1) | 8415(2)  | 3815(1)  | 36(1) |
| C(3)  | 4811(1) | 7268(2)  | 3434(1)  | 32(1) |
| C(4)  | 4363(1) | 7164(2)  | 2587(1)  | 31(1) |
| C(5)  | 4424(1) | 8201(2)  | 1974(1)  | 35(1) |
| C(6)  | 3969(1) | 8136(2)  | 1189(1)  | 36(1) |
| C(7)  | 3432(1) | 7046(2)  | 977(1)   | 33(1) |
| C(8)  | 3387(1) | 5991(2)  | 1584(1)  | 34(1) |
| C(9)  | 3846(1) | 6044(2)  | 2369(1)  | 34(1) |
| C(10) | 2920(1) | 7036(2)  | 148(1)   | 32(1) |
| C(11) | 3140(1) | 7555(2)  | -566(1)  | 36(1) |
| C(12) | 2663(1) | 7562(2)  | -1336(1) | 36(1) |
| C(13) | 1937(1) | 7079(2)  | -1414(1) | 35(1) |
| C(14) | 1706(1) | 6554(2)  | -712(1)  | 36(1) |
| C(15) | 2194(1) | 6526(2)  | 58(1)    | 36(1) |
| C(16) | 1352(1) | 8378(2)  | -2730(1) | 34(1) |
| C(17) | 1664(1) | 9765(2)  | -2588(1) | 41(1) |
| C(18) | 1444(1) | 10814(2) | -3195(1) | 45(1) |
| C(19) | 928(1)  | 10513(2) | -3926(1) | 46(1) |

|       |         |         |          |       |
|-------|---------|---------|----------|-------|
| C(20) | 618(1)  | 9140(2) | -4063(1) | 42(1) |
| C(21) | 829(1)  | 8052(2) | -3461(1) | 34(1) |
| C(22) | 599(1)  | 6560(2) | -3385(1) | 35(1) |
| C(23) | 104(1)  | 5643(2) | -3907(1) | 44(1) |
| C(24) | -3(1)   | 4243(2) | -3643(1) | 50(1) |
| C(25) | 383(1)  | 3742(2) | -2869(1) | 47(1) |
| C(26) | 881(1)  | 4622(2) | -2341(1) | 41(1) |
| C(27) | 980(1)  | 6042(2) | -2606(1) | 34(1) |
| C(28) | 6015(1) | 8859(2) | 5255(1)  | 39(1) |
| C(29) | 6116(1) | 8203(2) | 6121(1)  | 41(1) |
| C(30) | 6632(1) | 9104(2) | 6777(1)  | 40(1) |
| C(31) | 6736(1) | 8432(2) | 7644(1)  | 44(1) |
| C(32) | 7315(1) | 9183(2) | 8305(1)  | 39(1) |
| C(33) | 7392(1) | 8473(2) | 9159(1)  | 42(1) |
| C(34) | 8040(1) | 9010(2) | 9820(1)  | 46(1) |
| C(35) | 8142(1) | 8117(3) | 10619(1) | 63(1) |
| N(1)  | 4842(1) | 6129(2) | 4001(1)  | 37(1) |
| N(2)  | 5516(1) | 7992(2) | 4621(1)  | 34(1) |
| N(3)  | 1445(1) | 7152(2) | -2207(1) | 36(1) |

**Table S7.** Bond lengths [Å] and angles [°] for **ImL2**.

| Bond lengths [Å] |          |
|------------------|----------|
| C(1)-N(1)        | 1.318(2) |
| C(1)-N(2)        | 1.357(2) |
| C(1)-H(1)        | 0.95     |
| C(2)-N(2)        | 1.369(2) |
| C(2)-C(3)        | 1.369(2) |
| C(2)-H(2)        | 0.95     |
| C(3)-N(1)        | 1.386(2) |
| C(3)-C(4)        | 1.460(2) |
| C(4)-C(9)        | 1.393(2) |
| C(4)-C(5)        | 1.399(2) |
| C(5)-C(6)        | 1.381(2) |
| C(5)-H(5)        | 0.95     |
| C(6)-C(7)        | 1.396(2) |
| C(6)-H(6)        | 0.95     |
| C(7)-C(8)        | 1.396(2) |
| C(7)-C(10)       | 1.482(2) |
| C(8)-C(9)        | 1.383(2) |
| C(8)-H(8)        | 0.95     |

|              |          |
|--------------|----------|
| C(9)-H(9)    | 0.95     |
| C(10)-C(11)  | 1.394(2) |
| C(10)-C(15)  | 1.396(2) |
| C(11)-C(12)  | 1.377(2) |
| C(11)-H(11)  | 0.95     |
| C(12)-C(13)  | 1.389(2) |
| C(12)-H(12)  | 0.95     |
| C(13)-C(14)  | 1.389(2) |
| C(13)-N(3)   | 1.420(2) |
| C(14)-C(15)  | 1.386(2) |
| C(14)-H(14)  | 0.95     |
| C(15)-H(15)  | 0.95     |
| C(16)-C(17)  | 1.391(2) |
| C(16)-N(3)   | 1.396(2) |
| C(16)-C(21)  | 1.403(2) |
| C(17)-C(18)  | 1.377(3) |
| C(17)-H(17)  | 0.95     |
| C(18)-C(19)  | 1.392(3) |
| C(18)-H(18)  | 0.95     |
| C(19)-C(20)  | 1.377(3) |
| C(19)-H(19)  | 0.95     |
| C(20)-C(21)  | 1.394(2) |
| C(20)-H(20)  | 0.95     |
| C(21)-C(22)  | 1.440(2) |
| C(22)-C(23)  | 1.393(2) |
| C(22)-C(27)  | 1.402(2) |
| C(23)-C(24)  | 1.375(3) |
| C(23)-H(23)  | 0.95     |
| C(24)-C(25)  | 1.394(3) |
| C(24)-H(24)  | 0.95     |
| C(25)-C(26)  | 1.380(3) |
| C(25)-H(25)  | 0.95     |
| C(26)-C(27)  | 1.391(2) |
| C(26)-H(26)  | 0.95     |
| C(27)-N(3)   | 1.398(2) |
| C(28)-N(2)   | 1.467(2) |
| C(28)-C(29)  | 1.512(2) |
| C(28)-H(28A) | 0.99     |
| C(28)-H(28B) | 0.99     |
| C(29)-C(30)  | 1.519(2) |
| C(29)-H(29A) | 0.99     |

|                        |            |
|------------------------|------------|
| C(29)-H(29B)           | 0.99       |
| C(30)-C(31)            | 1.519(2)   |
| C(30)-H(30A)           | 0.99       |
| C(30)-H(30B)           | 0.99       |
| C(31)-C(32)            | 1.516(2)   |
| C(31)-H(31A)           | 0.99       |
| C(31)-H(31B)           | 0.99       |
| C(32)-C(33)            | 1.518(2)   |
| C(32)-H(32A)           | 0.99       |
| C(32)-H(32B)           | 0.99       |
| C(33)-C(34)            | 1.517(2)   |
| C(33)-H(33A)           | 0.99       |
| C(33)-H(33B)           | 0.99       |
| C(34)-C(35)            | 1.516(3)   |
| C(34)-H(34A)           | 0.99       |
| C(34)-H(34B)           | 0.99       |
| C(35)-H(35A)           | 0.98       |
| C(35)-H(35B)           | 0.98       |
| C(35)-H(35C)           | 0.98       |
| <b>Bond angles [°]</b> |            |
| N(1)-C(1)-N(2)         | 112.44(15) |
| N(1)-C(1)-H(1)         | 123.8      |
| N(2)-C(1)-H(1)         | 123.8      |
| N(2)-C(2)-C(3)         | 106.95(15) |
| N(2)-C(2)-H(2)         | 126.5      |
| C(3)-C(2)-H(2)         | 126.5      |
| C(2)-C(3)-N(1)         | 109.17(15) |
| C(2)-C(3)-C(4)         | 129.40(15) |
| N(1)-C(3)-C(4)         | 121.39(15) |
| C(9)-C(4)-C(5)         | 117.75(15) |
| C(9)-C(4)-C(3)         | 120.89(15) |
| C(5)-C(4)-C(3)         | 121.34(15) |
| C(6)-C(5)-C(4)         | 120.78(16) |
| C(6)-C(5)-H(5)         | 119.6      |
| C(4)-C(5)-H(5)         | 119.6      |
| C(5)-C(6)-C(7)         | 121.63(16) |
| C(5)-C(6)-H(6)         | 119.2      |
| C(7)-C(6)-H(6)         | 119.2      |
| C(6)-C(7)-C(8)         | 117.30(15) |
| C(6)-C(7)-C(10)        | 121.03(15) |
| C(8)-C(7)-C(10)        | 121.66(15) |

|                   |            |
|-------------------|------------|
| C(9)-C(8)-C(7)    | 121.30(16) |
| C(9)-C(8)-H(8)    | 119.4      |
| C(7)-C(8)-H(8)    | 119.3      |
| C(8)-C(9)-C(4)    | 121.17(15) |
| C(8)-C(9)-H(9)    | 119.4      |
| C(4)-C(9)-H(9)    | 119.4      |
| C(11)-C(10)-C(15) | 117.64(16) |
| C(11)-C(10)-C(7)  | 121.42(15) |
| C(15)-C(10)-C(7)  | 120.94(15) |
| C(12)-C(11)-C(10) | 121.49(16) |
| C(12)-C(11)-H(11) | 119.3      |
| C(10)-C(11)-H(11) | 119.3      |
| C(11)-C(12)-C(13) | 120.33(16) |
| C(11)-C(12)-H(12) | 119.8      |
| C(13)-C(12)-H(12) | 119.8      |
| C(12)-C(13)-C(14) | 119.15(16) |
| C(12)-C(13)-N(3)  | 119.44(15) |
| C(14)-C(13)-N(3)  | 121.40(15) |
| C(15)-C(14)-C(13) | 120.17(16) |
| C(15)-C(14)-H(14) | 119.9      |
| C(13)-C(14)-H(14) | 119.9      |
| C(14)-C(15)-C(10) | 121.19(16) |
| C(14)-C(15)-H(15) | 119.4      |
| C(10)-C(15)-H(15) | 119.4      |
| C(17)-C(16)-N(3)  | 129.33(16) |
| C(17)-C(16)-C(21) | 121.48(16) |
| N(3)-C(16)-C(21)  | 109.09(15) |
| C(18)-C(17)-C(16) | 117.64(17) |
| C(18)-C(17)-H(17) | 121.2      |
| C(16)-C(17)-H(17) | 121.2      |
| C(17)-C(18)-C(19) | 121.81(18) |
| C(17)-C(18)-H(18) | 119.1      |
| C(19)-C(18)-H(18) | 119.1      |
| C(20)-C(19)-C(18) | 120.39(17) |
| C(20)-C(19)-H(19) | 119.8      |
| C(18)-C(19)-H(19) | 119.8      |
| C(19)-C(20)-C(21) | 119.25(17) |
| C(19)-C(20)-H(20) | 120.4      |
| C(21)-C(20)-H(20) | 120.4      |
| C(20)-C(21)-C(16) | 119.43(16) |
| C(20)-C(21)-C(22) | 133.71(17) |

|                     |            |
|---------------------|------------|
| C(16)-C(21)-C(22)   | 106.81(15) |
| C(23)-C(22)-C(27)   | 119.64(17) |
| C(23)-C(22)-C(21)   | 133.11(17) |
| C(27)-C(22)-C(21)   | 107.24(15) |
| C(24)-C(23)-C(22)   | 119.07(19) |
| C(24)-C(23)-H(23)   | 120.5      |
| C(22)-C(23)-H(23)   | 120.5      |
| C(23)-C(24)-C(25)   | 120.60(18) |
| C(23)-C(24)-H(24)   | 119.7      |
| C(25)-C(24)-H(24)   | 119.7      |
| C(26)-C(25)-C(24)   | 121.65(18) |
| C(26)-C(25)-H(25)   | 119.2      |
| C(24)-C(25)-H(25)   | 119.2      |
| C(25)-C(26)-C(27)   | 117.48(18) |
| C(25)-C(26)-H(26)   | 121.3      |
| C(27)-C(26)-H(26)   | 121.3      |
| C(26)-C(27)-N(3)    | 129.63(16) |
| C(26)-C(27)-C(22)   | 121.55(16) |
| N(3)-C(27)-C(22)    | 108.81(14) |
| N(2)-C(28)-C(29)    | 112.65(14) |
| N(2)-C(28)-H(28A)   | 109.1      |
| C(29)-C(28)-H(28A)  | 109.1      |
| N(2)-C(28)-H(28B)   | 109.1      |
| C(29)-C(28)-H(28B)  | 109.1      |
| H(28A)-C(28)-H(28B) | 107.8      |
| C(28)-C(29)-C(30)   | 112.54(15) |
| C(28)-C(29)-H(29A)  | 109.1      |
| C(30)-C(29)-H(29A)  | 109.1      |
| C(28)-C(29)-H(29B)  | 109.1      |
| C(30)-C(29)-H(29B)  | 109.1      |
| H(29A)-C(29)-H(29B) | 107.8      |
| C(31)-C(30)-C(29)   | 112.23(15) |
| C(31)-C(30)-H(30A)  | 109.2      |
| C(29)-C(30)-H(30A)  | 109.2      |
| C(31)-C(30)-H(30B)  | 109.2      |
| C(29)-C(30)-H(30B)  | 109.2      |
| H(30A)-C(30)-H(30B) | 107.9      |
| C(32)-C(31)-C(30)   | 114.49(15) |
| C(32)-C(31)-H(31A)  | 108.6      |
| C(30)-C(31)-H(31A)  | 108.6      |
| C(32)-C(31)-H(31B)  | 108.6      |



|                     |            |
|---------------------|------------|
| C(30)-C(31)-H(31B)  | 108.6      |
| H(31A)-C(31)-H(31B) | 107.6      |
| C(31)-C(32)-C(33)   | 112.23(15) |
| C(31)-C(32)-H(32A)  | 109.2      |
| C(33)-C(32)-H(32A)  | 109.2      |
| C(31)-C(32)-H(32B)  | 109.2      |
| C(33)-C(32)-H(32B)  | 109.2      |
| H(32A)-C(32)-H(32B) | 107.9      |
| C(34)-C(33)-C(32)   | 115.21(16) |
| C(34)-C(33)-H(33A)  | 108.5      |
| C(32)-C(33)-H(33A)  | 108.5      |
| C(34)-C(33)-H(33B)  | 108.5      |
| C(32)-C(33)-H(33B)  | 108.5      |
| H(33A)-C(33)-H(33B) | 107.5      |
| C(35)-C(34)-C(33)   | 112.18(17) |
| C(35)-C(34)-H(34A)  | 109.2      |
| C(33)-C(34)-H(34A)  | 109.2      |
| C(35)-C(34)-H(34B)  | 109.2      |
| C(33)-C(34)-H(34B)  | 109.2      |
| H(34A)-C(34)-H(34B) | 107.9      |
| C(34)-C(35)-H(35A)  | 109.5      |
| C(34)-C(35)-H(35B)  | 109.5      |
| H(35A)-C(35)-H(35B) | 109.5      |
| C(34)-C(35)-H(35C)  | 109.5      |
| H(35A)-C(35)-H(35C) | 109.5      |
| H(35B)-C(35)-H(35C) | 109.5      |
| C(1)-N(1)-C(3)      | 105.19(14) |
| C(1)-N(2)-C(2)      | 106.25(14) |
| C(1)-N(2)-C(28)     | 127.62(14) |
| C(2)-N(2)-C(28)     | 126.09(14) |
| C(16)-N(3)-C(27)    | 108.04(13) |
| C(16)-N(3)-C(13)    | 124.71(14) |
| C(27)-N(3)-C(13)    | 127.25(14) |

**Table S8.** Anisotropic displacement parameters ( $\text{\AA}^2 \times 10^3$ ) for **ImL2**.

|      | U <sup>11</sup> | U <sup>22</sup> | U <sup>33</sup> | U <sup>23</sup> | U <sup>13</sup> | U <sup>12</sup> |
|------|-----------------|-----------------|-----------------|-----------------|-----------------|-----------------|
| C(1) | 41(1)           | 29(1)           | 40(1)           | 4(1)            | 8(1)            | -1(1)           |
| C(2) | 41(1)           | 31(1)           | 38(1)           | 5(1)            | 11(1)           | -1(1)           |
| C(3) | 34(1)           | 27(1)           | 38(1)           | 1(1)            | 14(1)           | 2(1)            |
| C(4) | 32(1)           | 28(1)           | 35(1)           | -1(1)           | 11(1)           | 5(1)            |

|       |       |       |       |        |       |        |
|-------|-------|-------|-------|--------|-------|--------|
| C(5)  | 36(1) | 31(1) | 41(1) | 1(1)   | 11(1) | -2(1)  |
| C(6)  | 37(1) | 32(1) | 39(1) | 5(1)   | 11(1) | 1(1)   |
| C(7)  | 32(1) | 30(1) | 37(1) | 0(1)   | 11(1) | 4(1)   |
| C(8)  | 37(1) | 28(1) | 39(1) | 0(1)   | 11(1) | -2(1)  |
| C(9)  | 40(1) | 26(1) | 39(1) | 3(1)   | 13(1) | 3(1)   |
| C(10) | 35(1) | 27(1) | 37(1) | 1(1)   | 10(1) | 3(1)   |
| C(11) | 35(1) | 33(1) | 42(1) | 3(1)   | 11(1) | 0(1)   |
| C(12) | 40(1) | 34(1) | 37(1) | 4(1)   | 12(1) | 1(1)   |
| C(13) | 39(1) | 28(1) | 37(1) | 0(1)   | 9(1)  | 2(1)   |
| C(14) | 33(1) | 34(1) | 43(1) | 2(1)   | 10(1) | 0(1)   |
| C(15) | 38(1) | 34(1) | 38(1) | 4(1)   | 12(1) | 0(1)   |
| C(16) | 38(1) | 28(1) | 37(1) | 2(1)   | 11(1) | 4(1)   |
| C(17) | 44(1) | 32(1) | 45(1) | 0(1)   | 9(1)  | 0(1)   |
| C(18) | 48(1) | 29(1) | 62(1) | 3(1)   | 15(1) | 2(1)   |
| C(19) | 50(1) | 37(1) | 52(1) | 13(1)  | 12(1) | 7(1)   |
| C(20) | 44(1) | 43(1) | 39(1) | 5(1)   | 8(1)  | 8(1)   |
| C(21) | 34(1) | 35(1) | 35(1) | -1(1)  | 11(1) | 3(1)   |
| C(22) | 34(1) | 36(1) | 37(1) | -4(1)  | 13(1) | 1(1)   |
| C(23) | 41(1) | 47(1) | 45(1) | -8(1)  | 12(1) | -3(1)  |
| C(24) | 49(1) | 47(1) | 57(1) | -15(1) | 18(1) | -14(1) |
| C(25) | 50(1) | 35(1) | 64(1) | -7(1)  | 28(1) | -8(1)  |
| C(26) | 45(1) | 35(1) | 48(1) | 1(1)   | 18(1) | -1(1)  |
| C(27) | 36(1) | 30(1) | 40(1) | -3(1)  | 13(1) | -2(1)  |
| C(28) | 42(1) | 33(1) | 41(1) | -2(1)  | 8(1)  | -6(1)  |
| C(29) | 43(1) | 38(1) | 42(1) | 2(1)   | 8(1)  | -7(1)  |
| C(30) | 43(1) | 34(1) | 42(1) | 0(1)   | 8(1)  | -3(1)  |
| C(31) | 45(1) | 40(1) | 45(1) | 3(1)   | 6(1)  | -6(1)  |
| C(32) | 39(1) | 32(1) | 45(1) | -2(1)  | 10(1) | -2(1)  |
| C(33) | 44(1) | 42(1) | 41(1) | -2(1)  | 8(1)  | -2(1)  |
| C(34) | 48(1) | 42(1) | 48(1) | -5(1)  | 7(1)  | -4(1)  |
| C(35) | 68(2) | 74(2) | 42(1) | -4(1)  | 4(1)  | -12(1) |
| N(1)  | 41(1) | 29(1) | 40(1) | 3(1)   | 8(1)  | 0(1)   |
| N(2)  | 37(1) | 28(1) | 36(1) | 1(1)   | 8(1)  | -2(1)  |
| N(3)  | 40(1) | 30(1) | 37(1) | 3(1)   | 6(1)  | -1(1)  |

**Table S9.** Hydrogen coordinates (x 104) and isotropic displacement parameters ( $\text{\AA}^2 \times 103$ ) for **ImL2**.

|      | x    | y    | z    | U(eq) |
|------|------|------|------|-------|
| H(1) | 5395 | 6045 | 5195 | 44    |
| H(2) | 5300 | 9331 | 3568 | 43    |
| H(5) | 4783 | 8959 | 2099 | 42    |

|        |      |       |       |    |
|--------|------|-------|-------|----|
| H(6)   | 4022 | 8850  | 782   | 43 |
| H(8)   | 3035 | 5222  | 1455  | 41 |
| H(9)   | 3807 | 5304  | 2767  | 41 |
| H(11)  | 3631 | 7912  | -521  | 44 |
| H(12)  | 2830 | 7898  | -1815 | 44 |
| H(14)  | 1212 | 6213  | -759  | 43 |
| H(15)  | 2031 | 6152  | 532   | 43 |
| H(17)  | 2016 | 9981  | -2091 | 49 |
| H(18)  | 1651 | 11769 | -3112 | 55 |
| H(19)  | 789  | 11260 | -4333 | 56 |
| H(20)  | 265  | 8936  | -4561 | 51 |
| H(23)  | -157 | 5979  | -4437 | 53 |
| H(24)  | -344 | 3613  | -3992 | 60 |
| H(25)  | 301  | 2770  | -2700 | 57 |
| H(26)  | 1145 | 4272  | -1816 | 50 |
| H(28A) | 5812 | 9862  | 5264  | 46 |
| H(28B) | 6504 | 8935  | 5098  | 46 |
| H(29A) | 6319 | 7201  | 6112  | 49 |
| H(29B) | 5626 | 8127  | 6278  | 49 |
| H(30A) | 7121 | 9185  | 6619  | 48 |
| H(30B) | 6428 | 10104 | 6790  | 48 |
| H(31A) | 6255 | 8460  | 7825  | 52 |
| H(31B) | 6877 | 7391  | 7611  | 52 |
| H(32A) | 7178 | 10225 | 8343  | 46 |
| H(32B) | 7799 | 9148  | 8133  | 46 |
| H(33A) | 6929 | 8646  | 9363  | 51 |
| H(33B) | 7443 | 7402  | 9094  | 51 |
| H(34A) | 8499 | 8956  | 9596  | 56 |
| H(34B) | 7958 | 10049 | 9949  | 56 |
| H(35A) | 7694 | 8189  | 10852 | 94 |
| H(35B) | 8567 | 8496  | 11026 | 94 |
| H(35C) | 8230 | 7090  | 10495 | 94 |

**Table S10.** Torsion angles [°] for **ImL2**.

|                     |             |
|---------------------|-------------|
| N(2)-C(2)-C(3)-N(1) | -0.10(19)   |
| N(2)-C(2)-C(3)-C(4) | 177.55(15)  |
| C(2)-C(3)-C(4)-C(9) | -165.11(17) |
| N(1)-C(3)-C(4)-C(9) | 12.3(2)     |
| C(2)-C(3)-C(4)-C(5) | 13.2(3)     |
| N(1)-C(3)-C(4)-C(5) | -169.37(15) |
| C(9)-C(4)-C(5)-C(6) | 2.0(2)      |

|                         |             |
|-------------------------|-------------|
| C(3)-C(4)-C(5)-C(6)     | -176.40(15) |
| C(4)-C(5)-C(6)-C(7)     | 0.2(3)      |
| C(5)-C(6)-C(7)-C(8)     | -2.0(2)     |
| C(5)-C(6)-C(7)-C(10)    | 176.65(15)  |
| C(6)-C(7)-C(8)-C(9)     | 1.4(2)      |
| C(10)-C(7)-C(8)-C(9)    | -177.17(15) |
| C(7)-C(8)-C(9)-C(4)     | 0.8(3)      |
| C(5)-C(4)-C(9)-C(8)     | -2.5(2)     |
| C(3)-C(4)-C(9)-C(8)     | 175.88(15)  |
| C(6)-C(7)-C(10)-C(11)   | 32.3(2)     |
| C(8)-C(7)-C(10)-C(11)   | -149.19(16) |
| C(6)-C(7)-C(10)-C(15)   | -146.78(16) |
| C(8)-C(7)-C(10)-C(15)   | 31.8(2)     |
| C(15)-C(10)-C(11)-C(12) | -0.2(3)     |
| C(7)-C(10)-C(11)-C(12)  | -179.28(15) |
| C(10)-C(11)-C(12)-C(13) | 1.6(3)      |
| C(11)-C(12)-C(13)-C(14) | -1.7(3)     |
| C(11)-C(12)-C(13)-N(3)  | 177.37(15)  |
| C(12)-C(13)-C(14)-C(15) | 0.5(3)      |
| N(3)-C(13)-C(14)-C(15)  | -178.55(15) |
| C(13)-C(14)-C(15)-C(10) | 0.8(3)      |
| C(11)-C(10)-C(15)-C(14) | -1.0(2)     |
| C(7)-C(10)-C(15)-C(14)  | 178.08(15)  |
| N(3)-C(16)-C(17)-C(18)  | -176.24(17) |
| C(21)-C(16)-C(17)-C(18) | -0.3(3)     |
| C(16)-C(17)-C(18)-C(19) | 0.1(3)      |
| C(17)-C(18)-C(19)-C(20) | 0.2(3)      |
| C(18)-C(19)-C(20)-C(21) | -0.2(3)     |
| C(19)-C(20)-C(21)-C(16) | 0.0(3)      |
| C(19)-C(20)-C(21)-C(22) | 176.83(18)  |
| C(17)-C(16)-C(21)-C(20) | 0.2(3)      |
| N(3)-C(16)-C(21)-C(20)  | 176.96(15)  |
| C(17)-C(16)-C(21)-C(22) | -177.36(16) |
| N(3)-C(16)-C(21)-C(22)  | -0.66(18)   |
| C(20)-C(21)-C(22)-C(23) | 3.3(3)      |
| C(16)-C(21)-C(22)-C(23) | -179.57(18) |
| C(20)-C(21)-C(22)-C(27) | -176.12(18) |
| C(16)-C(21)-C(22)-C(27) | 1.01(18)    |
| C(27)-C(22)-C(23)-C(24) | 0.2(3)      |
| C(21)-C(22)-C(23)-C(24) | -179.14(18) |
| C(22)-C(23)-C(24)-C(25) | -0.6(3)     |

---

|                         |             |
|-------------------------|-------------|
| C(23)-C(24)-C(25)-C(26) | 0.2(3)      |
| C(24)-C(25)-C(26)-C(27) | 0.5(3)      |
| C(25)-C(26)-C(27)-N(3)  | -179.62(17) |
| C(25)-C(26)-C(27)-C(22) | -0.9(3)     |
| C(23)-C(22)-C(27)-C(26) | 0.5(3)      |
| C(21)-C(22)-C(27)-C(26) | -179.95(15) |
| C(23)-C(22)-C(27)-N(3)  | 179.50(15)  |
| C(21)-C(22)-C(27)-N(3)  | -0.99(18)   |
| N(2)-C(28)-C(29)-C(30)  | -179.98(15) |
| C(28)-C(29)-C(30)-C(31) | -179.59(16) |
| C(29)-C(30)-C(31)-C(32) | 173.08(16)  |
| C(30)-C(31)-C(32)-C(33) | 179.68(16)  |
| C(31)-C(32)-C(33)-C(34) | 170.94(16)  |
| C(32)-C(33)-C(34)-C(35) | -172.47(17) |
| N(2)-C(1)-N(1)-C(3)     | 0.58(19)    |
| C(2)-C(3)-N(1)-C(1)     | -0.28(19)   |
| C(4)-C(3)-N(1)-C(1)     | -178.15(15) |
| N(1)-C(1)-N(2)-C(2)     | -0.65(19)   |
| N(1)-C(1)-N(2)-C(28)    | -178.42(15) |
| C(3)-C(2)-N(2)-C(1)     | 0.44(18)    |
| C(3)-C(2)-N(2)-C(28)    | 178.25(15)  |
| C(29)-C(28)-N(2)-C(1)   | -13.6(2)    |
| C(29)-C(28)-N(2)-C(2)   | 169.08(16)  |
| C(17)-C(16)-N(3)-C(27)  | 176.42(17)  |
| C(21)-C(16)-N(3)-C(27)  | 0.05(18)    |
| C(17)-C(16)-N(3)-C(13)  | -4.2(3)     |
| C(21)-C(16)-N(3)-C(13)  | 179.40(15)  |
| C(26)-C(27)-N(3)-C(16)  | 179.44(17)  |
| C(22)-C(27)-N(3)-C(16)  | 0.60(18)    |
| C(26)-C(27)-N(3)-C(13)  | 0.1(3)      |
| C(22)-C(27)-N(3)-C(13)  | -178.73(15) |
| C(12)-C(13)-N(3)-C(16)  | -47.5(2)    |
| C(14)-C(13)-N(3)-C(16)  | 131.52(18)  |
| C(12)-C(13)-N(3)-C(27)  | 131.67(18)  |
| C(14)-C(13)-N(3)-C(27)  | -49.3(2)    |

---

5. Single crystal X-ray diffraction full data set of  $\text{ZnCl}_2(\text{ImL1})_2$  complex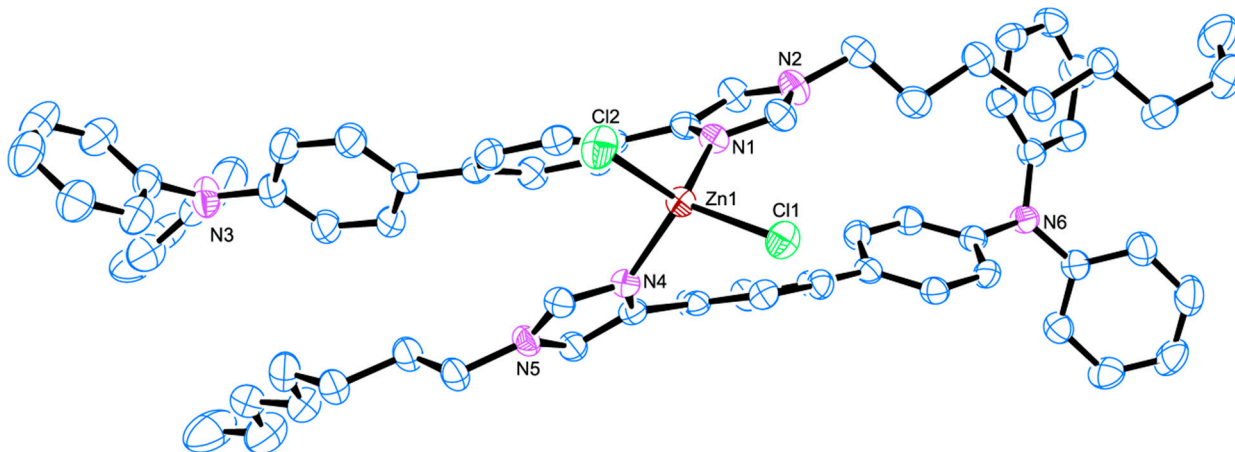

Figure 7 from the main text. Perspective view of  $\text{ZnCl}_2(\text{ImL1})_2$  showing the atom-numbering scheme. Displacement ellipsoids are drawn at the 50% probability level and H atoms are shown as small spheres of arbitrary radii. H atoms on C atoms are omitted for clarity. Atom labels on C atoms are not shown.

**Table S11.** Atomic coordinates ( $\times 10^4$ ) and equivalent isotropic displacement parameters ( $\text{\AA}^2 \times 10^3$ ) for  $\text{ZnCl}_2(\text{ImL1})_2$  complex.

|       | x       | y       | z       | U(eq) |
|-------|---------|---------|---------|-------|
| C(1)  | 8772(2) | 7526(3) | 2162(1) | 35(1) |
| C(2)  | 7542(2) | 7761(3) | 2360(1) | 39(1) |
| C(3)  | 8054(2) | 6690(3) | 2512(1) | 31(1) |
| C(4)  | 7857(2) | 5816(3) | 2772(1) | 31(1) |
| C(5)  | 6980(2) | 5445(3) | 2802(1) | 34(1) |
| C(6)  | 6783(2) | 4659(3) | 3050(1) | 39(1) |
| C(7)  | 7450(2) | 4220(3) | 3281(1) | 35(1) |
| C(8)  | 8326(2) | 4558(3) | 3245(1) | 38(1) |
| C(9)  | 8525(2) | 5345(3) | 2998(1) | 35(1) |
| C(10) | 7233(2) | 3491(3) | 3560(1) | 39(1) |
| C(11) | 6500(2) | 2533(4) | 3557(1) | 43(1) |
| C(12) | 6304(3) | 1899(4) | 3822(1) | 46(1) |
| C(13) | 6824(2) | 2180(4) | 4097(1) | 45(1) |
| C(14) | 7547(3) | 3143(4) | 4102(1) | 51(1) |
| C(15) | 7744(2) | 3778(4) | 3837(1) | 47(1) |
| C(16) | 5765(2) | 1188(4) | 4423(1) | 46(1) |

---

|       |         |          |         |       |
|-------|---------|----------|---------|-------|
| C(17) | 5061(3) | 2141(6)  | 4353(1) | 71(1) |
| C(18) | 4202(3) | 1707(7)  | 4429(1) | 77(1) |
| C(19) | 4106(3) | 410(6)   | 4568(1) | 75(1) |
| C(20) | 4772(3) | -534(6)  | 4631(1) | 72(1) |
| C(21) | 5605(2) | -158(5)  | 4562(1) | 58(1) |
| C(22) | 7346(2) | 1310(4)  | 4614(1) | 43(1) |
| C(23) | 7257(3) | 1827(5)  | 4900(1) | 53(1) |
| C(24) | 7930(3) | 1606(6)  | 5136(1) | 64(1) |
| C(25) | 8692(3) | 884(5)   | 5098(1) | 62(1) |
| C(26) | 8793(3) | 354(5)   | 4814(1) | 57(1) |
| C(27) | 8118(2) | 556(4)   | 4573(1) | 51(1) |
| C(28) | 7748(2) | 9552(3)  | 1936(1) | 41(1) |
| C(29) | 7341(2) | 9061(4)  | 1624(1) | 42(1) |
| C(30) | 7110(2) | 10471(4) | 1429(1) | 42(1) |
| C(31) | 6821(2) | 10115(4) | 1100(1) | 43(1) |
| C(32) | 6588(2) | 11486(3) | 902(1)  | 39(1) |
| C(33) | 6248(3) | 11023(4) | 578(1)  | 50(1) |
| C(34) | 6071(3) | 12325(5) | 356(1)  | 62(1) |
| C(35) | 5328(3) | 13285(6) | 419(1)  | 75(1) |
| C(36) | 9504(2) | 2169(3)  | 2732(1) | 31(1) |
| C(37) | 8124(2) | 1455(3)  | 2604(1) | 32(1) |
| C(38) | 8296(2) | 2606(3)  | 2424(1) | 28(1) |
| C(39) | 7685(2) | 3305(3)  | 2177(1) | 27(1) |
| C(40) | 6770(2) | 3277(3)  | 2187(1) | 31(1) |
| C(41) | 6186(2) | 3959(3)  | 1965(1) | 33(1) |
| C(42) | 6487(2) | 4700(3)  | 1723(1) | 30(1) |
| C(43) | 7403(2) | 4678(3)  | 1708(1) | 30(1) |
| C(44) | 7992(2) | 3984(3)  | 1931(1) | 30(1) |
| C(45) | 5854(2) | 5501(3)  | 1493(1) | 30(1) |
| C(46) | 5992(2) | 5610(3)  | 1193(1) | 32(1) |
| C(47) | 5427(2) | 6442(3)  | 984(1)  | 34(1) |
| C(48) | 4693(2) | 7164(3)  | 1072(1) | 32(1) |
| C(49) | 4530(2) | 7026(3)  | 1369(1) | 36(1) |
| C(50) | 5107(2) | 6221(3)  | 1576(1) | 34(1) |
| C(51) | 3995(2) | 9590(3)  | 942(1)  | 35(1) |
| C(52) | 4550(2) | 10298(3) | 1175(1) | 37(1) |
| C(53) | 4436(2) | 11788(4) | 1238(1) | 40(1) |
| C(54) | 3766(2) | 12607(4) | 1072(1) | 47(1) |
| C(55) | 3194(3) | 11898(4) | 851(1)  | 54(1) |
| C(56) | 3292(2) | 10403(4) | 786(1)  | 48(1) |
| C(57) | 3910(2) | 7568(3)  | 561(1)  | 34(1) |

---

|       |          |          |         |       |
|-------|----------|----------|---------|-------|
| C(58) | 4005(2)  | 8452(4)  | 314(1)  | 48(1) |
| C(59) | 3784(3)  | 7891(5)  | 23(1)   | 61(1) |
| C(60) | 3465(3)  | 6465(5)  | -24(1)  | 56(1) |
| C(61) | 3375(2)  | 5584(4)  | 220(1)  | 51(1) |
| C(62) | 3595(2)  | 6122(4)  | 513(1)  | 40(1) |
| C(63) | 9048(2)  | -9(4)    | 3024(1) | 39(1) |
| C(64) | 8384(2)  | 0(5)     | 3246(1) | 43(1) |
| C(65) | 8636(3)  | -1214(4) | 3484(1) | 49(1) |
| C(66) | 7998(3)  | -1340(5) | 3716(1) | 57(1) |
| C(67) | 7077(3)  | -1890(4) | 3598(1) | 55(1) |
| C(68) | 6532(3)  | -2312(4) | 3847(1) | 58(1) |
| C(69) | 5616(3)  | -2881(6) | 3735(1) | 74(1) |
| C(70) | 5093(4)  | -3360(7) | 3988(1) | 98(2) |
| N(1)  | 8840(2)  | 6552(3)  | 2386(1) | 30(1) |
| N(2)  | 8010(2)  | 8298(3)  | 2141(1) | 38(1) |
| N(3)  | 6646(2)  | 1500(4)  | 4367(1) | 50(1) |
| N(4)  | 9175(2)  | 3050(2)  | 2506(1) | 27(1) |
| N(5)  | 8901(2)  | 1193(3)  | 2798(1) | 33(1) |
| N(6)  | 4135(2)  | 8081(3)  | 865(1)  | 36(1) |
| Zn(1) | 9812(1)  | 4974(1)  | 2426(1) | 28(1) |
| Cl(1) | 10389(1) | 4960(1)  | 1993(1) | 39(1) |
| Cl(2) | 10890(1) | 5275(1)  | 2822(1) | 47(1) |

**Table S12.** Bond lengths [Å] and angles [°] for **ZnCl<sub>2</sub>(ImL1)<sub>2</sub>** complex.

| Bond lengths [Å] |          |
|------------------|----------|
| C(1)-N(1)        | 1.318(4) |
| C(1)-N(2)        | 1.336(4) |
| C(1)-H(1)        | 0.95     |
| C(2)-C(3)        | 1.353(4) |
| C(2)-N(2)        | 1.371(4) |
| C(2)-H(2)        | 0.95     |
| C(3)-N(1)        | 1.389(4) |
| C(3)-C(4)        | 1.467(4) |
| C(4)-C(9)        | 1.387(4) |
| C(4)-C(5)        | 1.393(4) |
| C(5)-C(6)        | 1.378(4) |
| C(5)-H(5)        | 0.95     |
| C(6)-C(7)        | 1.393(4) |
| C(6)-H(6)        | 0.95     |
| C(7)-C(8)        | 1.390(4) |



|             |          |
|-------------|----------|
| C(7)-C(10)  | 1.481(4) |
| C(8)-C(9)   | 1.378(4) |
| C(8)-H(8)   | 0.95     |
| C(9)-H(9)   | 0.95     |
| C(10)-C(15) | 1.388(5) |
| C(10)-C(11) | 1.400(5) |
| C(11)-C(12) | 1.381(5) |
| C(11)-H(11) | 0.95     |
| C(12)-C(13) | 1.384(5) |
| C(12)-H(12) | 0.95     |
| C(13)-C(14) | 1.390(5) |
| C(13)-N(3)  | 1.409(4) |
| C(14)-C(15) | 1.382(5) |
| C(14)-H(14) | 0.95     |
| C(15)-H(15) | 0.95     |
| C(16)-C(17) | 1.365(6) |
| C(16)-C(21) | 1.393(6) |
| C(16)-N(3)  | 1.417(4) |
| C(17)-C(18) | 1.442(7) |
| C(17)-H(17) | 0.95     |
| C(18)-C(19) | 1.333(7) |
| C(18)-H(18) | 0.95     |
| C(19)-C(20) | 1.314(7) |
| C(19)-H(19) | 0.95     |
| C(20)-C(21) | 1.380(6) |
| C(20)-H(20) | 0.95     |
| C(21)-H(21) | 0.95     |
| C(22)-C(23) | 1.381(5) |
| C(22)-C(27) | 1.383(5) |
| C(22)-N(3)  | 1.425(4) |
| C(23)-C(24) | 1.372(5) |
| C(23)-H(23) | 0.95     |
| C(24)-C(25) | 1.354(6) |
| C(24)-H(24) | 0.95     |
| C(25)-C(26) | 1.382(5) |
| C(25)-H(25) | 0.95     |
| C(26)-C(27) | 1.385(5) |
| C(26)-H(26) | 0.95     |
| C(27)-H(27) | 0.95     |
| C(28)-N(2)  | 1.466(4) |
| C(28)-C(29) | 1.508(5) |

|              |          |
|--------------|----------|
| C(28)-H(28A) | 0.99     |
| C(28)-H(28B) | 0.99     |
| C(29)-C(30)  | 1.543(4) |
| C(29)-H(29A) | 0.99     |
| C(29)-H(29B) | 0.99     |
| C(30)-C(31)  | 1.507(4) |
| C(30)-H(30A) | 0.99     |
| C(30)-H(30B) | 0.99     |
| C(31)-C(32)  | 1.524(4) |
| C(31)-H(31A) | 0.99     |
| C(31)-H(31B) | 0.99     |
| C(32)-C(33)  | 1.520(4) |
| C(32)-H(32A) | 0.99     |
| C(32)-H(32B) | 0.99     |
| C(33)-C(34)  | 1.529(5) |
| C(33)-H(33A) | 0.99     |
| C(33)-H(33B) | 0.99     |
| C(34)-C(35)  | 1.472(6) |
| C(34)-H(34A) | 0.99     |
| C(34)-H(34B) | 0.99     |
| C(35)-H(35A) | 0.98     |
| C(35)-H(35B) | 0.98     |
| C(35)-H(35C) | 0.98     |
| C(36)-N(4)   | 1.319(3) |
| C(36)-N(5)   | 1.327(4) |
| C(36)-H(36)  | 0.95     |
| C(37)-C(38)  | 1.355(4) |
| C(37)-N(5)   | 1.377(4) |
| C(37)-H(37)  | 0.95     |
| C(38)-N(4)   | 1.386(3) |
| C(38)-C(39)  | 1.473(4) |
| C(39)-C(40)  | 1.391(4) |
| C(39)-C(44)  | 1.394(4) |
| C(40)-C(41)  | 1.375(4) |
| C(40)-H(40)  | 0.95     |
| C(41)-C(42)  | 1.397(4) |
| C(41)-H(41)  | 0.95     |
| C(42)-C(43)  | 1.397(4) |
| C(42)-C(45)  | 1.483(4) |
| C(43)-C(44)  | 1.383(4) |
| C(43)-H(43)  | 0.95     |

|              |          |
|--------------|----------|
| C(44)-H(44)  | 0.95     |
| C(45)-C(46)  | 1.389(4) |
| C(45)-C(50)  | 1.395(4) |
| C(46)-C(47)  | 1.389(4) |
| C(46)-H(46)  | 0.95     |
| C(47)-C(48)  | 1.388(4) |
| C(47)-H(47)  | 0.95     |
| C(48)-C(49)  | 1.387(4) |
| C(48)-N(6)   | 1.422(4) |
| C(49)-C(50)  | 1.381(4) |
| C(49)-H(49)  | 0.95     |
| C(50)-H(50)  | 0.95     |
| C(51)-C(56)  | 1.391(4) |
| C(51)-C(52)  | 1.393(4) |
| C(51)-N(6)   | 1.417(4) |
| C(52)-C(53)  | 1.379(4) |
| C(52)-H(52)  | 0.95     |
| C(53)-C(54)  | 1.380(5) |
| C(53)-H(53)  | 0.95     |
| C(54)-C(55)  | 1.372(5) |
| C(54)-H(54)  | 0.95     |
| C(55)-C(56)  | 1.381(5) |
| C(55)-H(55)  | 0.95     |
| C(56)-H(56)  | 0.95     |
| C(57)-C(58)  | 1.383(4) |
| C(57)-C(62)  | 1.385(4) |
| C(57)-N(6)   | 1.424(4) |
| C(58)-C(59)  | 1.386(5) |
| C(58)-H(58)  | 0.95     |
| C(59)-C(60)  | 1.370(6) |
| C(59)-H(59)  | 0.95     |
| C(60)-C(61)  | 1.367(5) |
| C(60)-H(60)  | 0.95     |
| C(61)-C(62)  | 1.386(4) |
| C(61)-H(61)  | 0.95     |
| C(62)-H(62)  | 0.95     |
| C(63)-N(5)   | 1.470(4) |
| C(63)-C(64)  | 1.506(4) |
| C(63)-H(63A) | 0.99     |
| C(63)-H(63B) | 0.99     |
| C(64)-C(65)  | 1.528(4) |

|                 |           |
|-----------------|-----------|
| C(64)-H(64A)    | 0.99      |
| C(64)-H(64B)    | 0.99      |
| C(65)-C(66)     | 1.517(5)  |
| C(65)-H(65A)    | 0.99      |
| C(65)-H(65B)    | 0.99      |
| C(66)-C(67)     | 1.500(5)  |
| C(66)-H(66A)    | 0.99      |
| C(66)-H(66B)    | 0.99      |
| C(67)-C(68)     | 1.524(6)  |
| C(67)-H(67A)    | 0.99      |
| C(67)-H(67B)    | 0.99      |
| C(68)-C(69)     | 1.495(6)  |
| C(68)-H(68A)    | 0.99      |
| C(68)-H(68B)    | 0.99      |
| C(69)-C(70)     | 1.528(7)  |
| C(69)-H(69A)    | 0.99      |
| C(69)-H(69B)    | 0.99      |
| C(70)-H(70A)    | 0.98      |
| C(70)-H(70B)    | 0.98      |
| C(70)-H(70C)    | 0.98      |
| N(1)-Zn(1)      | 2.029(2)  |
| N(4)-Zn(1)      | 2.030(2)  |
| Zn(1)-Cl(1)     | 2.2274(8) |
| Zn(1)-Cl(2)     | 2.2453(8) |
| Bond angles [°] |           |
| N(1)-C(1)-N(2)  | 111.6(3)  |
| N(1)-C(1)-H(1)  | 124.2     |
| N(2)-C(1)-H(1)  | 124.2     |
| C(3)-C(2)-N(2)  | 106.7(3)  |
| C(3)-C(2)-H(2)  | 126.6     |
| N(2)-C(2)-H(2)  | 126.6     |
| C(2)-C(3)-N(1)  | 108.8(3)  |
| C(2)-C(3)-C(4)  | 127.5(3)  |
| N(1)-C(3)-C(4)  | 123.7(2)  |
| C(9)-C(4)-C(5)  | 117.7(3)  |
| C(9)-C(4)-C(3)  | 121.9(3)  |
| C(5)-C(4)-C(3)  | 120.5(3)  |
| C(6)-C(5)-C(4)  | 121.1(3)  |
| C(6)-C(5)-H(5)  | 119.5     |
| C(4)-C(5)-H(5)  | 119.5     |
| C(5)-C(6)-C(7)  | 121.4(3)  |

|                   |          |
|-------------------|----------|
| C(5)-C(6)-H(6)    | 119.3    |
| C(7)-C(6)-H(6)    | 119.3    |
| C(8)-C(7)-C(6)    | 117.1(3) |
| C(8)-C(7)-C(10)   | 121.4(3) |
| C(6)-C(7)-C(10)   | 121.4(3) |
| C(9)-C(8)-C(7)    | 121.6(3) |
| C(9)-C(8)-H(8)    | 119.2    |
| C(7)-C(8)-H(8)    | 119.2    |
| C(8)-C(9)-C(4)    | 121.1(3) |
| C(8)-C(9)-H(9)    | 119.5    |
| C(4)-C(9)-H(9)    | 119.5    |
| C(15)-C(10)-C(11) | 117.4(3) |
| C(15)-C(10)-C(7)  | 120.3(3) |
| C(11)-C(10)-C(7)  | 122.3(3) |
| C(12)-C(11)-C(10) | 120.8(3) |
| C(12)-C(11)-H(11) | 119.6    |
| C(10)-C(11)-H(11) | 119.6    |
| C(11)-C(12)-C(13) | 121.3(3) |
| C(11)-C(12)-H(12) | 119.3    |
| C(13)-C(12)-H(12) | 119.3    |
| C(12)-C(13)-C(14) | 118.3(3) |
| C(12)-C(13)-N(3)  | 121.7(3) |
| C(14)-C(13)-N(3)  | 120.0(3) |
| C(15)-C(14)-C(13) | 120.4(3) |
| C(15)-C(14)-H(14) | 119.8    |
| C(13)-C(14)-H(14) | 119.8    |
| C(14)-C(15)-C(10) | 121.8(3) |
| C(14)-C(15)-H(15) | 119.1    |
| C(10)-C(15)-H(15) | 119.1    |
| C(17)-C(16)-C(21) | 117.5(4) |
| C(17)-C(16)-N(3)  | 124.0(4) |
| C(21)-C(16)-N(3)  | 118.4(3) |
| C(16)-C(17)-C(18) | 118.6(5) |
| C(16)-C(17)-H(17) | 120.7    |
| C(18)-C(17)-H(17) | 120.7    |
| C(19)-C(18)-C(17) | 120.2(5) |
| C(19)-C(18)-H(18) | 119.9    |
| C(17)-C(18)-H(18) | 119.9    |
| C(20)-C(19)-C(18) | 122.0(5) |
| C(20)-C(19)-H(19) | 119      |
| C(18)-C(19)-H(19) | 119      |

|                     |          |
|---------------------|----------|
| C(19)-C(20)-C(21)   | 119.4(5) |
| C(19)-C(20)-H(20)   | 120.3    |
| C(21)-C(20)-H(20)   | 120.3    |
| C(20)-C(21)-C(16)   | 122.2(4) |
| C(20)-C(21)-H(21)   | 118.9    |
| C(16)-C(21)-H(21)   | 118.9    |
| C(23)-C(22)-C(27)   | 118.7(3) |
| C(23)-C(22)-N(3)    | 121.0(3) |
| C(27)-C(22)-N(3)    | 120.3(3) |
| C(24)-C(23)-C(22)   | 120.2(4) |
| C(24)-C(23)-H(23)   | 119.9    |
| C(22)-C(23)-H(23)   | 119.9    |
| C(25)-C(24)-C(23)   | 121.6(3) |
| C(25)-C(24)-H(24)   | 119.2    |
| C(23)-C(24)-H(24)   | 119.2    |
| C(24)-C(25)-C(26)   | 119.1(4) |
| C(24)-C(25)-H(25)   | 120.4    |
| C(26)-C(25)-H(25)   | 120.4    |
| C(25)-C(26)-C(27)   | 120.1(4) |
| C(25)-C(26)-H(26)   | 120      |
| C(27)-C(26)-H(26)   | 120      |
| C(22)-C(27)-C(26)   | 120.4(3) |
| C(22)-C(27)-H(27)   | 119.8    |
| C(26)-C(27)-H(27)   | 119.8    |
| N(2)-C(28)-C(29)    | 113.1(3) |
| N(2)-C(28)-H(28A)   | 109      |
| C(29)-C(28)-H(28A)  | 109      |
| N(2)-C(28)-H(28B)   | 109      |
| C(29)-C(28)-H(28B)  | 109      |
| H(28A)-C(28)-H(28B) | 107.8    |
| C(28)-C(29)-C(30)   | 108.2(3) |
| C(28)-C(29)-H(29A)  | 110.1    |
| C(30)-C(29)-H(29A)  | 110.1    |
| C(28)-C(29)-H(29B)  | 110.1    |
| C(30)-C(29)-H(29B)  | 110.1    |
| H(29A)-C(29)-H(29B) | 108.4    |
| C(31)-C(30)-C(29)   | 112.8(3) |
| C(31)-C(30)-H(30A)  | 109      |
| C(29)-C(30)-H(30A)  | 109      |
| C(31)-C(30)-H(30B)  | 109      |
| C(29)-C(30)-H(30B)  | 109      |

|                     |          |
|---------------------|----------|
| H(30A)-C(30)-H(30B) | 107.8    |
| C(30)-C(31)-C(32)   | 114.1(3) |
| C(30)-C(31)-H(31A)  | 108.7    |
| C(32)-C(31)-H(31A)  | 108.7    |
| C(30)-C(31)-H(31B)  | 108.7    |
| C(32)-C(31)-H(31B)  | 108.7    |
| H(31A)-C(31)-H(31B) | 107.6    |
| C(33)-C(32)-C(31)   | 110.6(3) |
| C(33)-C(32)-H(32A)  | 109.5    |
| C(31)-C(32)-H(32A)  | 109.5    |
| C(33)-C(32)-H(32B)  | 109.5    |
| C(31)-C(32)-H(32B)  | 109.5    |
| H(32A)-C(32)-H(32B) | 108.1    |
| C(32)-C(33)-C(34)   | 114.4(3) |
| C(32)-C(33)-H(33A)  | 108.7    |
| C(34)-C(33)-H(33A)  | 108.7    |
| C(32)-C(33)-H(33B)  | 108.7    |
| C(34)-C(33)-H(33B)  | 108.7    |
| H(33A)-C(33)-H(33B) | 107.6    |
| C(35)-C(34)-C(33)   | 113.0(3) |
| C(35)-C(34)-H(34A)  | 109      |
| C(33)-C(34)-H(34A)  | 109      |
| C(35)-C(34)-H(34B)  | 109      |
| C(33)-C(34)-H(34B)  | 109      |
| H(34A)-C(34)-H(34B) | 107.8    |
| C(34)-C(35)-H(35A)  | 109.5    |
| C(34)-C(35)-H(35B)  | 109.5    |
| H(35A)-C(35)-H(35B) | 109.5    |
| C(34)-C(35)-H(35C)  | 109.5    |
| H(35A)-C(35)-H(35C) | 109.5    |
| H(35B)-C(35)-H(35C) | 109.5    |
| N(4)-C(36)-N(5)     | 111.6(2) |
| N(4)-C(36)-H(36)    | 124.2    |
| N(5)-C(36)-H(36)    | 124.2    |
| C(38)-C(37)-N(5)    | 106.5(2) |
| C(38)-C(37)-H(37)   | 126.7    |
| N(5)-C(37)-H(37)    | 126.7    |
| C(37)-C(38)-N(4)    | 108.6(2) |
| C(37)-C(38)-C(39)   | 127.8(3) |
| N(4)-C(38)-C(39)    | 123.6(2) |
| C(40)-C(39)-C(44)   | 118.5(2) |

|                   |          |
|-------------------|----------|
| C(40)-C(39)-C(38) | 119.4(2) |
| C(44)-C(39)-C(38) | 122.1(2) |
| C(41)-C(40)-C(39) | 120.6(3) |
| C(41)-C(40)-H(40) | 119.7    |
| C(39)-C(40)-H(40) | 119.7    |
| C(40)-C(41)-C(42) | 121.5(3) |
| C(40)-C(41)-H(41) | 119.2    |
| C(42)-C(41)-H(41) | 119.2    |
| C(41)-C(42)-C(43) | 117.6(2) |
| C(41)-C(42)-C(45) | 120.9(2) |
| C(43)-C(42)-C(45) | 121.5(2) |
| C(44)-C(43)-C(42) | 121.0(2) |
| C(44)-C(43)-H(43) | 119.5    |
| C(42)-C(43)-H(43) | 119.5    |
| C(43)-C(44)-C(39) | 120.6(2) |
| C(43)-C(44)-H(44) | 119.7    |
| C(39)-C(44)-H(44) | 119.7    |
| C(46)-C(45)-C(50) | 117.5(2) |
| C(46)-C(45)-C(42) | 121.9(3) |
| C(50)-C(45)-C(42) | 120.6(2) |
| C(45)-C(46)-C(47) | 121.5(3) |
| C(45)-C(46)-H(46) | 119.2    |
| C(47)-C(46)-H(46) | 119.2    |
| C(48)-C(47)-C(46) | 120.0(3) |
| C(48)-C(47)-H(47) | 120      |
| C(46)-C(47)-H(47) | 120      |
| C(49)-C(48)-C(47) | 119.1(3) |
| C(49)-C(48)-N(6)  | 120.3(3) |
| C(47)-C(48)-N(6)  | 120.6(3) |
| C(50)-C(49)-C(48) | 120.4(3) |
| C(50)-C(49)-H(49) | 119.8    |
| C(48)-C(49)-H(49) | 119.8    |
| C(49)-C(50)-C(45) | 121.5(3) |
| C(49)-C(50)-H(50) | 119.3    |
| C(45)-C(50)-H(50) | 119.3    |
| C(56)-C(51)-C(52) | 118.2(3) |
| C(56)-C(51)-N(6)  | 120.5(3) |
| C(52)-C(51)-N(6)  | 121.3(3) |
| C(53)-C(52)-C(51) | 120.9(3) |
| C(53)-C(52)-H(52) | 119.5    |
| C(51)-C(52)-H(52) | 119.5    |



|                     |          |
|---------------------|----------|
| C(52)-C(53)-C(54)   | 120.4(3) |
| C(52)-C(53)-H(53)   | 119.8    |
| C(54)-C(53)-H(53)   | 119.8    |
| C(55)-C(54)-C(53)   | 118.8(3) |
| C(55)-C(54)-H(54)   | 120.6    |
| C(53)-C(54)-H(54)   | 120.6    |
| C(54)-C(55)-C(56)   | 121.6(3) |
| C(54)-C(55)-H(55)   | 119.2    |
| C(56)-C(55)-H(55)   | 119.2    |
| C(55)-C(56)-C(51)   | 119.9(3) |
| C(55)-C(56)-H(56)   | 120      |
| C(51)-C(56)-H(56)   | 120      |
| C(58)-C(57)-C(62)   | 118.8(3) |
| C(58)-C(57)-N(6)    | 122.5(3) |
| C(62)-C(57)-N(6)    | 118.7(3) |
| C(57)-C(58)-C(59)   | 120.1(3) |
| C(57)-C(58)-H(58)   | 120      |
| C(59)-C(58)-H(58)   | 120      |
| C(60)-C(59)-C(58)   | 120.9(3) |
| C(60)-C(59)-H(59)   | 119.5    |
| C(58)-C(59)-H(59)   | 119.5    |
| C(61)-C(60)-C(59)   | 119.2(3) |
| C(61)-C(60)-H(60)   | 120.4    |
| C(59)-C(60)-H(60)   | 120.4    |
| C(60)-C(61)-C(62)   | 120.8(3) |
| C(60)-C(61)-H(61)   | 119.6    |
| C(62)-C(61)-H(61)   | 119.6    |
| C(57)-C(62)-C(61)   | 120.2(3) |
| C(57)-C(62)-H(62)   | 119.9    |
| C(61)-C(62)-H(62)   | 119.9    |
| N(5)-C(63)-C(64)    | 113.3(3) |
| N(5)-C(63)-H(63A)   | 108.9    |
| C(64)-C(63)-H(63A)  | 108.9    |
| N(5)-C(63)-H(63B)   | 108.9    |
| C(64)-C(63)-H(63B)  | 108.9    |
| H(63A)-C(63)-H(63B) | 107.7    |
| C(63)-C(64)-C(65)   | 109.1(3) |
| C(63)-C(64)-H(64A)  | 109.9    |
| C(65)-C(64)-H(64A)  | 109.9    |
| C(63)-C(64)-H(64B)  | 109.9    |
| C(65)-C(64)-H(64B)  | 109.9    |

|                     |            |
|---------------------|------------|
| H(64A)-C(64)-H(64B) | 108.3      |
| C(66)-C(65)-C(64)   | 113.9(3)   |
| C(66)-C(65)-H(65A)  | 108.8      |
| C(64)-C(65)-H(65A)  | 108.8      |
| C(66)-C(65)-H(65B)  | 108.8      |
| C(64)-C(65)-H(65B)  | 108.8      |
| H(65A)-C(65)-H(65B) | 107.7      |
| C(67)-C(66)-C(65)   | 115.8(3)   |
| C(67)-C(66)-H(66A)  | 108.3      |
| C(65)-C(66)-H(66A)  | 108.3      |
| C(67)-C(66)-H(66B)  | 108.3      |
| C(65)-C(66)-H(66B)  | 108.3      |
| H(66A)-C(66)-H(66B) | 107.4      |
| C(66)-C(67)-C(68)   | 113.4(3)   |
| C(66)-C(67)-H(67A)  | 108.9      |
| C(68)-C(67)-H(67A)  | 108.9      |
| C(66)-C(67)-H(67B)  | 108.9      |
| C(68)-C(67)-H(67B)  | 108.9      |
| H(67A)-C(67)-H(67B) | 107.7      |
| C(69)-C(68)-C(67)   | 114.3(3)   |
| C(69)-C(68)-H(68A)  | 108.7      |
| C(67)-C(68)-H(68A)  | 108.7      |
| C(69)-C(68)-H(68B)  | 108.7      |
| C(67)-C(68)-H(68B)  | 108.7      |
| H(68A)-C(68)-H(68B) | 107.6      |
| C(68)-C(69)-C(70)   | 113.6(4)   |
| C(68)-C(69)-H(69A)  | 108.8      |
| C(70)-C(69)-H(69A)  | 108.8      |
| C(68)-C(69)-H(69B)  | 108.8      |
| C(70)-C(69)-H(69B)  | 108.8      |
| H(69A)-C(69)-H(69B) | 107.7      |
| C(69)-C(70)-H(70A)  | 109.5      |
| C(69)-C(70)-H(70B)  | 109.5      |
| H(70A)-C(70)-H(70B) | 109.5      |
| C(69)-C(70)-H(70C)  | 109.5      |
| H(70A)-C(70)-H(70C) | 109.5      |
| H(70B)-C(70)-H(70C) | 109.5      |
| C(1)-N(1)-C(3)      | 105.6(2)   |
| C(1)-N(1)-Zn(1)     | 120.21(19) |
| C(3)-N(1)-Zn(1)     | 132.68(19) |
| C(1)-N(2)-C(2)      | 107.2(2)   |

|                   |            |
|-------------------|------------|
| C(1)-N(2)-C(28)   | 126.5(3)   |
| C(2)-N(2)-C(28)   | 126.2(3)   |
| C(13)-N(3)-C(16)  | 122.2(3)   |
| C(13)-N(3)-C(22)  | 120.0(3)   |
| C(16)-N(3)-C(22)  | 117.1(3)   |
| C(36)-N(4)-C(38)  | 105.9(2)   |
| C(36)-N(4)-Zn(1)  | 120.34(19) |
| C(38)-N(4)-Zn(1)  | 131.11(18) |
| C(36)-N(5)-C(37)  | 107.4(2)   |
| C(36)-N(5)-C(63)  | 126.4(2)   |
| C(37)-N(5)-C(63)  | 126.1(2)   |
| C(51)-N(6)-C(48)  | 119.1(2)   |
| C(51)-N(6)-C(57)  | 121.0(2)   |
| C(48)-N(6)-C(57)  | 118.2(2)   |
| N(1)-Zn(1)-N(4)   | 104.43(9)  |
| N(1)-Zn(1)-Cl(1)  | 107.24(7)  |
| N(4)-Zn(1)-Cl(1)  | 113.76(7)  |
| N(1)-Zn(1)-Cl(2)  | 114.91(7)  |
| N(4)-Zn(1)-Cl(2)  | 105.77(7)  |
| Cl(1)-Zn(1)-Cl(2) | 110.74(3)  |

**TableS13.** Anisotropic displacement parameters ( $\text{\AA}^2 \times 10^3$ ) for **ZnCl<sub>2</sub>(ImL1)<sub>2</sub>** complex.

|       | U <sup>11</sup> | U <sup>22</sup> | U <sup>33</sup> | U <sup>23</sup> | U <sup>13</sup> | U <sup>12</sup> |
|-------|-----------------|-----------------|-----------------|-----------------|-----------------|-----------------|
| C(1)  | 31(1)           | 32(2)           | 43(2)           | 6(1)            | 11(1)           | 1(1)            |
| C(2)  | 32(2)           | 38(2)           | 48(2)           | 7(1)            | 14(1)           | 6(1)            |
| C(3)  | 30(1)           | 28(1)           | 35(1)           | -2(1)           | 7(1)            | 0(1)            |
| C(4)  | 35(2)           | 27(1)           | 32(1)           | -5(1)           | 10(1)           | 5(1)            |
| C(5)  | 33(1)           | 38(2)           | 34(1)           | 1(1)            | 7(1)            | 5(1)            |
| C(6)  | 36(1)           | 41(2)           | 41(2)           | 2(1)            | 11(1)           | 0(1)            |
| C(7)  | 45(2)           | 30(1)           | 33(1)           | -3(1)           | 10(1)           | 4(1)            |
| C(8)  | 44(2)           | 37(2)           | 33(1)           | 1(1)            | 4(1)            | 6(1)            |
| C(9)  | 31(1)           | 35(2)           | 38(1)           | -3(1)           | 4(1)            | 2(1)            |
| C(10) | 49(2)           | 34(2)           | 34(2)           | 4(1)            | 8(1)            | 1(1)            |
| C(11) | 53(2)           | 40(2)           | 34(2)           | 1(1)            | -1(1)           | -5(1)           |
| C(12) | 55(2)           | 44(2)           | 39(2)           | 5(1)            | 3(1)            | -11(2)          |
| C(13) | 56(2)           | 43(2)           | 36(2)           | 7(1)            | 5(1)            | -6(2)           |
| C(14) | 64(2)           | 56(2)           | 32(2)           | 2(1)            | 2(2)            | -15(2)          |
| C(15) | 53(2)           | 46(2)           | 41(2)           | 3(1)            | 7(1)            | -12(2)          |
| C(16) | 44(2)           | 60(2)           | 34(2)           | -7(2)           | 4(1)            | 0(2)            |

|       |       |        |       |        |       |        |
|-------|-------|--------|-------|--------|-------|--------|
| C(17) | 81(3) | 78(3)  | 53(2) | -2(2)  | 5(2)  | 18(2)  |
| C(18) | 56(3) | 120(4) | 53(2) | -16(3) | 2(2)  | 28(3)  |
| C(19) | 67(3) | 103(4) | 55(2) | -33(3) | 13(2) | -16(3) |
| C(20) | 77(3) | 74(3)  | 71(3) | -22(2) | 30(2) | -29(2) |
| C(21) | 56(2) | 64(2)  | 57(2) | -5(2)  | 16(2) | -11(2) |
| C(22) | 49(2) | 47(2)  | 35(2) | 8(1)   | 7(1)  | -14(2) |
| C(23) | 50(2) | 66(2)  | 47(2) | -8(2)  | 15(2) | -14(2) |
| C(24) | 56(2) | 95(3)  | 40(2) | -16(2) | 8(2)  | -25(2) |
| C(25) | 51(2) | 86(3)  | 45(2) | 2(2)   | -3(2) | -22(2) |
| C(26) | 47(2) | 69(3)  | 54(2) | -2(2)  | 2(2)  | -3(2)  |
| C(27) | 53(2) | 63(2)  | 38(2) | -2(2)  | 5(2)  | -5(2)  |
| C(28) | 41(2) | 33(2)  | 50(2) | 5(1)   | 5(1)  | -1(1)  |
| C(29) | 43(2) | 36(2)  | 49(2) | -1(1)  | 15(1) | 4(1)   |
| C(30) | 40(2) | 40(2)  | 45(2) | 7(1)   | 7(1)  | 3(1)   |
| C(31) | 45(2) | 40(2)  | 46(2) | 7(2)   | 14(1) | 9(2)   |
| C(32) | 41(2) | 36(2)  | 39(2) | 4(1)   | 7(1)  | 3(1)   |
| C(33) | 51(2) | 50(2)  | 47(2) | -6(2)  | 3(2)  | 3(2)   |
| C(34) | 63(2) | 82(3)  | 38(2) | 3(2)   | -2(2) | 9(2)   |
| C(35) | 96(3) | 79(3)  | 44(2) | -4(2)  | -8(2) | 28(3)  |
| C(36) | 26(1) | 31(1)  | 35(1) | 1(1)   | -2(1) | 3(1)   |
| C(37) | 32(1) | 31(1)  | 32(1) | 1(1)   | -2(1) | -3(1)  |
| C(38) | 28(1) | 28(1)  | 28(1) | -4(1)  | 1(1)  | 1(1)   |
| C(39) | 28(1) | 24(1)  | 28(1) | -3(1)  | -3(1) | -1(1)  |
| C(40) | 30(1) | 28(1)  | 33(1) | 6(1)   | 0(1)  | -7(1)  |
| C(41) | 22(1) | 36(2)  | 40(2) | 6(1)   | -2(1) | -5(1)  |
| C(42) | 29(1) | 26(2)  | 33(1) | 0(1)   | -2(1) | -2(1)  |
| C(43) | 30(1) | 33(2)  | 27(1) | 2(1)   | 0(1)  | -3(1)  |
| C(44) | 23(1) | 35(1)  | 32(1) | -2(1)  | 1(1)  | 0(1)   |
| C(45) | 28(1) | 26(1)  | 32(1) | 1(1)   | -4(1) | -3(1)  |
| C(46) | 31(1) | 29(1)  | 34(1) | 0(1)   | -2(1) | 3(1)   |
| C(47) | 38(2) | 34(2)  | 27(1) | -1(1)  | -1(1) | 3(1)   |
| C(48) | 33(1) | 27(1)  | 33(1) | -1(1)  | -2(1) | 1(1)   |
| C(49) | 33(2) | 35(2)  | 39(2) | 1(1)   | 4(1)  | 4(1)   |
| C(50) | 35(2) | 35(2)  | 31(1) | 2(1)   | 3(1)  | -1(1)  |
| C(51) | 34(1) | 33(2)  | 38(1) | 3(1)   | 6(1)  | 5(1)   |
| C(52) | 35(1) | 36(2)  | 39(1) | 1(1)   | 2(1)  | 7(1)   |
| C(53) | 42(2) | 39(2)  | 42(2) | -5(1)  | 9(1)  | 0(1)   |
| C(54) | 56(2) | 33(2)  | 54(2) | 0(1)   | 14(2) | 10(1)  |
| C(55) | 56(2) | 43(2)  | 62(2) | 4(2)   | -1(2) | 23(2)  |
| C(56) | 43(2) | 46(2)  | 51(2) | -1(1)  | -7(1) | 13(1)  |
| C(57) | 29(1) | 37(2)  | 35(1) | 3(1)   | -3(1) | 6(1)   |

|       |        |        |       |        |       |        |
|-------|--------|--------|-------|--------|-------|--------|
| C(58) | 54(2)  | 46(2)  | 42(2) | 6(2)   | 1(2)  | -4(2)  |
| C(59) | 73(3)  | 69(3)  | 38(2) | 12(2)  | 1(2)  | -2(2)  |
| C(60) | 61(2)  | 69(2)  | 33(2) | -8(2)  | -9(2) | 7(2)   |
| C(61) | 48(2)  | 50(2)  | 48(2) | -9(2)  | -9(2) | -4(2)  |
| C(62) | 38(2)  | 41(2)  | 41(2) | 4(1)   | 0(1)  | -2(1)  |
| C(63) | 45(2)  | 32(1)  | 37(1) | 8(2)   | -2(1) | 4(2)   |
| C(64) | 50(2)  | 38(1)  | 40(1) | 7(2)   | 0(1)  | 0(2)   |
| C(65) | 65(2)  | 40(2)  | 41(2) | 7(1)   | -2(2) | -1(2)  |
| C(66) | 73(3)  | 57(2)  | 39(2) | 7(2)   | 2(2)  | -5(2)  |
| C(67) | 69(2)  | 51(2)  | 42(2) | -3(2)  | 2(2)  | 1(2)   |
| C(68) | 81(3)  | 42(2)  | 50(2) | 0(2)   | 6(2)  | -5(2)  |
| C(69) | 74(3)  | 83(3)  | 65(3) | -13(2) | 10(2) | -12(2) |
| C(70) | 105(4) | 104(4) | 90(4) | -36(3) | 31(3) | -49(3) |
| N(1)  | 26(1)  | 28(1)  | 35(1) | 1(1)   | 5(1)  | 1(1)   |
| N(2)  | 34(1)  | 36(1)  | 46(1) | 10(1)  | 7(1)  | 4(1)   |
| N(3)  | 47(2)  | 63(2)  | 38(1) | 15(1)  | 4(1)  | -8(1)  |
| N(4)  | 23(1)  | 28(1)  | 31(1) | -1(1)  | 2(1)  | 1(1)   |
| N(5)  | 34(1)  | 29(1)  | 34(1) | 6(1)   | -1(1) | 3(1)   |
| N(6)  | 40(1)  | 32(1)  | 34(1) | 1(1)   | -7(1) | 9(1)   |
| Zn(1) | 21(1)  | 30(1)  | 31(1) | 0(1)   | 2(1)  | 0(1)   |
| Cl(1) | 33(1)  | 50(1)  | 38(1) | -1(1)  | 12(1) | -1(1)  |
| Cl(2) | 30(1)  | 67(1)  | 40(1) | 1(1)   | -7(1) | -12(1) |

**Table S14.** Hydrogen coordinates ( $\times 104$ ) and isotropic displacement parameters ( $\text{\AA}^2 \times 103$ ) for **ZnCl<sub>2</sub>(ImL1)<sub>2</sub>** complex.

|       | x    | y     | z    | U(eq) |
|-------|------|-------|------|-------|
| H(1)  | 9212 | 7662  | 2032 | 42    |
| H(2)  | 6969 | 8080  | 2397 | 46    |
| H(5)  | 6509 | 5737  | 2649 | 41    |
| H(6)  | 6179 | 4411  | 3064 | 46    |
| H(8)  | 8798 | 4239  | 3395 | 46    |
| H(9)  | 9131 | 5569  | 2982 | 42    |
| H(11) | 6134 | 2317  | 3372 | 52    |
| H(12) | 5801 | 1257  | 3816 | 55    |
| H(14) | 7908 | 3367  | 4289 | 61    |
| H(15) | 8243 | 4429  | 3845 | 56    |
| H(17) | 5136 | 3071  | 4257 | 85    |
| H(18) | 3701 | 2348  | 4380 | 92    |
| H(19) | 3540 | 160   | 4622 | 89    |
| H(20) | 4681 | -1467 | 4723 | 86    |
| H(21) | 6085 | -840  | 4612 | 70    |

|        |       |       |      |     |
|--------|-------|-------|------|-----|
| H(23)  | 6728  | 2337  | 4933 | 64  |
| H(24)  | 7859  | 1969  | 5331 | 76  |
| H(25)  | 9152  | 744   | 5264 | 74  |
| H(26)  | 9326  | -150  | 4784 | 69  |
| H(27)  | 8186  | 176   | 4379 | 62  |
| H(28A) | 8281  | 10172 | 1920 | 49  |
| H(28B) | 7313  | 10182 | 2024 | 49  |
| H(29A) | 6794  | 8467  | 1635 | 50  |
| H(29B) | 7769  | 8430  | 1532 | 50  |
| H(30A) | 6624  | 11020 | 1509 | 50  |
| H(30B) | 7639  | 11132 | 1448 | 50  |
| H(31A) | 6293  | 9451  | 1083 | 51  |
| H(31B) | 7307  | 9561  | 1022 | 51  |
| H(32A) | 6124  | 12078 | 984  | 46  |
| H(32B) | 7125  | 12122 | 904  | 46  |
| H(33A) | 5688  | 10450 | 577  | 60  |
| H(33B) | 6692  | 10348 | 506  | 60  |
| H(34A) | 6619  | 12938 | 366  | 74  |
| H(34B) | 5934  | 11923 | 148  | 74  |
| H(35A) | 4776  | 12697 | 399  | 112 |
| H(35B) | 5255  | 14113 | 273  | 112 |
| H(35C) | 5458  | 13684 | 625  | 112 |
| H(36)  | 10099 | 2226  | 2834 | 38  |
| H(37)  | 7575  | 932   | 2598 | 39  |
| H(40)  | 6546  | 2784  | 2349 | 37  |
| H(41)  | 5564  | 3925  | 1975 | 40  |
| H(43)  | 7625  | 5147  | 1543 | 36  |
| H(44)  | 8612  | 3970  | 1915 | 36  |
| H(46)  | 6485  | 5104  | 1129 | 38  |
| H(47)  | 5542  | 6518  | 781  | 40  |
| H(49)  | 4019  | 7488  | 1430 | 43  |
| H(50)  | 4993  | 6157  | 1780 | 41  |
| H(52)  | 5014  | 9747  | 1291 | 45  |
| H(53)  | 4821  | 12253 | 1398 | 49  |
| H(54)  | 3703  | 13644 | 1109 | 56  |
| H(55)  | 2719  | 12448 | 740  | 65  |
| H(56)  | 2880  | 9931  | 634  | 57  |
| H(58)  | 4221  | 9446  | 343  | 58  |
| H(59)  | 3856  | 8503  | -146 | 73  |
| H(60)  | 3308  | 6093  | -224 | 67  |
| H(61)  | 3160  | 4591  | 189  | 61  |

|        |      |       |      |     |
|--------|------|-------|------|-----|
| H(62)  | 3530 | 5497  | 680  | 48  |
| H(63A) | 9658 | 91    | 3138 | 47  |
| H(63B) | 9015 | -983  | 2918 | 47  |
| H(64A) | 7776 | -189  | 3138 | 52  |
| H(64B) | 8386 | 989   | 3346 | 52  |
| H(65A) | 8658 | -2188 | 3380 | 59  |
| H(65B) | 9243 | -1003 | 3591 | 59  |
| H(66A) | 8264 | -2022 | 3878 | 68  |
| H(66B) | 7944 | -344  | 3808 | 68  |
| H(67A) | 7127 | -2774 | 3468 | 66  |
| H(67B) | 6756 | -1102 | 3470 | 66  |
| H(68A) | 6860 | -3089 | 3976 | 70  |
| H(68B) | 6479 | -1423 | 3976 | 70  |
| H(69A) | 5665 | -3745 | 3600 | 88  |
| H(69B) | 5277 | -2089 | 3614 | 88  |
| H(70A) | 5378 | -4238 | 4091 | 147 |
| H(70B) | 4479 | -3609 | 3901 | 147 |
| H(70C) | 5087 | -2541 | 4133 | 147 |

**Table S15.** Torsion angles [°] for **ZnCl<sub>2</sub>(ImL1)<sub>2</sub>** complex.

|                       |           |
|-----------------------|-----------|
| N(2)-C(2)-C(3)-N(1)   | -0.4(3)   |
| N(2)-C(2)-C(3)-C(4)   | 177.9(3)  |
| C(2)-C(3)-C(4)-C(9)   | -146.9(3) |
| N(1)-C(3)-C(4)-C(9)   | 31.3(4)   |
| C(2)-C(3)-C(4)-C(5)   | 32.5(4)   |
| N(1)-C(3)-C(4)-C(5)   | -149.4(3) |
| C(9)-C(4)-C(5)-C(6)   | 1.1(4)    |
| C(3)-C(4)-C(5)-C(6)   | -178.2(3) |
| C(4)-C(5)-C(6)-C(7)   | 0.7(4)    |
| C(5)-C(6)-C(7)-C(8)   | -2.4(4)   |
| C(5)-C(6)-C(7)-C(10)  | 174.7(3)  |
| C(6)-C(7)-C(8)-C(9)   | 2.5(4)    |
| C(10)-C(7)-C(8)-C(9)  | -174.6(3) |
| C(7)-C(8)-C(9)-C(4)   | -0.8(4)   |
| C(5)-C(4)-C(9)-C(8)   | -1.0(4)   |
| C(3)-C(4)-C(9)-C(8)   | 178.3(3)  |
| C(8)-C(7)-C(10)-C(15) | 32.6(5)   |
| C(6)-C(7)-C(10)-C(15) | -144.4(3) |
| C(8)-C(7)-C(10)-C(11) | -149.3(3) |
| C(6)-C(7)-C(10)-C(11) | 33.7(5)   |

|                         |           |
|-------------------------|-----------|
| C(15)-C(10)-C(11)-C(12) | -0.3(5)   |
| C(7)-C(10)-C(11)-C(12)  | -178.5(3) |
| C(10)-C(11)-C(12)-C(13) | -0.4(6)   |
| C(11)-C(12)-C(13)-C(14) | 1.1(6)    |
| C(11)-C(12)-C(13)-N(3)  | -178.0(3) |
| C(12)-C(13)-C(14)-C(15) | -1.1(6)   |
| N(3)-C(13)-C(14)-C(15)  | 178.0(4)  |
| C(13)-C(14)-C(15)-C(10) | 0.4(6)    |
| C(11)-C(10)-C(15)-C(14) | 0.3(5)    |
| C(7)-C(10)-C(15)-C(14)  | 178.5(3)  |
| C(21)-C(16)-C(17)-C(18) | 0.2(6)    |
| N(3)-C(16)-C(17)-C(18)  | -178.3(3) |
| C(16)-C(17)-C(18)-C(19) | 1.0(6)    |
| C(17)-C(18)-C(19)-C(20) | -2.3(7)   |
| C(18)-C(19)-C(20)-C(21) | 2.3(7)    |
| C(19)-C(20)-C(21)-C(16) | -1.0(6)   |
| C(17)-C(16)-C(21)-C(20) | -0.2(5)   |
| N(3)-C(16)-C(21)-C(20)  | 178.4(3)  |
| C(27)-C(22)-C(23)-C(24) | 0.7(6)    |
| N(3)-C(22)-C(23)-C(24)  | 178.6(4)  |
| C(22)-C(23)-C(24)-C(25) | 0.0(6)    |
| C(23)-C(24)-C(25)-C(26) | -0.2(7)   |
| C(24)-C(25)-C(26)-C(27) | -0.3(6)   |
| C(23)-C(22)-C(27)-C(26) | -1.2(5)   |
| N(3)-C(22)-C(27)-C(26)  | -179.1(3) |
| C(25)-C(26)-C(27)-C(22) | 1.0(6)    |
| N(2)-C(28)-C(29)-C(30)  | -179.1(3) |
| C(28)-C(29)-C(30)-C(31) | 171.7(3)  |
| C(29)-C(30)-C(31)-C(32) | -179.9(3) |
| C(30)-C(31)-C(32)-C(33) | -176.4(3) |
| C(31)-C(32)-C(33)-C(34) | -175.1(3) |
| C(32)-C(33)-C(34)-C(35) | -66.4(5)  |
| N(5)-C(37)-C(38)-N(4)   | 0.1(3)    |
| N(5)-C(37)-C(38)-C(39)  | 179.6(3)  |
| C(37)-C(38)-C(39)-C(40) | 27.7(4)   |
| N(4)-C(38)-C(39)-C(40)  | -152.9(3) |
| C(37)-C(38)-C(39)-C(44) | -151.6(3) |
| N(4)-C(38)-C(39)-C(44)  | 27.8(4)   |
| C(44)-C(39)-C(40)-C(41) | -2.6(4)   |
| C(38)-C(39)-C(40)-C(41) | 178.1(3)  |
| C(39)-C(40)-C(41)-C(42) | -0.2(4)   |



|                         |           |
|-------------------------|-----------|
| C(40)-C(41)-C(42)-C(43) | 2.4(4)    |
| C(40)-C(41)-C(42)-C(45) | -176.6(3) |
| C(41)-C(42)-C(43)-C(44) | -1.8(4)   |
| C(45)-C(42)-C(43)-C(44) | 177.1(2)  |
| C(42)-C(43)-C(44)-C(39) | -0.9(4)   |
| C(40)-C(39)-C(44)-C(43) | 3.1(4)    |
| C(38)-C(39)-C(44)-C(43) | -177.6(2) |
| C(41)-C(42)-C(45)-C(46) | -148.0(3) |
| C(43)-C(42)-C(45)-C(46) | 33.1(4)   |
| C(41)-C(42)-C(45)-C(50) | 34.2(4)   |
| C(43)-C(42)-C(45)-C(50) | -144.7(3) |
| C(50)-C(45)-C(46)-C(47) | 2.0(4)    |
| C(42)-C(45)-C(46)-C(47) | -175.8(3) |
| C(45)-C(46)-C(47)-C(48) | -1.3(4)   |
| C(46)-C(47)-C(48)-C(49) | -0.7(4)   |
| C(46)-C(47)-C(48)-N(6)  | 176.8(3)  |
| C(47)-C(48)-C(49)-C(50) | 2.0(4)    |
| N(6)-C(48)-C(49)-C(50)  | -175.5(3) |
| C(48)-C(49)-C(50)-C(45) | -1.4(4)   |
| C(46)-C(45)-C(50)-C(49) | -0.6(4)   |
| C(42)-C(45)-C(50)-C(49) | 177.2(3)  |
| C(56)-C(51)-C(52)-C(53) | -3.4(5)   |
| N(6)-C(51)-C(52)-C(53)  | 176.8(3)  |
| C(51)-C(52)-C(53)-C(54) | 0.0(5)    |
| C(52)-C(53)-C(54)-C(55) | 2.9(5)    |
| C(53)-C(54)-C(55)-C(56) | -2.2(6)   |
| C(54)-C(55)-C(56)-C(51) | -1.3(6)   |
| C(52)-C(51)-C(56)-C(55) | 4.0(5)    |
| N(6)-C(51)-C(56)-C(55)  | -176.1(3) |
| C(62)-C(57)-C(58)-C(59) | 0.2(5)    |
| N(6)-C(57)-C(58)-C(59)  | 179.4(3)  |
| C(57)-C(58)-C(59)-C(60) | 0.5(6)    |
| C(58)-C(59)-C(60)-C(61) | -0.9(6)   |
| C(59)-C(60)-C(61)-C(62) | 0.6(6)    |
| C(58)-C(57)-C(62)-C(61) | -0.4(5)   |
| N(6)-C(57)-C(62)-C(61)  | -179.6(3) |
| C(60)-C(61)-C(62)-C(57) | 0.0(5)    |
| N(5)-C(63)-C(64)-C(65)  | -175.9(3) |
| C(63)-C(64)-C(65)-C(66) | -178.5(3) |
| C(64)-C(65)-C(66)-C(67) | 67.6(4)   |
| C(65)-C(66)-C(67)-C(68) | 167.6(3)  |

|                         |            |
|-------------------------|------------|
| C(66)-C(67)-C(68)-C(69) | -179.3(4)  |
| C(67)-C(68)-C(69)-C(70) | 177.6(4)   |
| N(2)-C(1)-N(1)-C(3)     | 1.5(3)     |
| N(2)-C(1)-N(1)-Zn(1)    | 169.0(2)   |
| C(2)-C(3)-N(1)-C(1)     | -0.6(3)    |
| C(4)-C(3)-N(1)-C(1)     | -179.0(3)  |
| C(2)-C(3)-N(1)-Zn(1)    | -165.9(2)  |
| C(4)-C(3)-N(1)-Zn(1)    | 15.7(4)    |
| N(1)-C(1)-N(2)-C(2)     | -1.7(4)    |
| N(1)-C(1)-N(2)-C(28)    | 174.5(3)   |
| C(3)-C(2)-N(2)-C(1)     | 1.3(4)     |
| C(3)-C(2)-N(2)-C(28)    | -175.0(3)  |
| C(29)-C(28)-N(2)-C(1)   | 83.6(4)    |
| C(29)-C(28)-N(2)-C(2)   | -100.8(4)  |
| C(12)-C(13)-N(3)-C(16)  | -34.6(5)   |
| C(14)-C(13)-N(3)-C(16)  | 146.4(4)   |
| C(12)-C(13)-N(3)-C(22)  | 154.9(4)   |
| C(14)-C(13)-N(3)-C(22)  | -24.1(5)   |
| C(17)-C(16)-N(3)-C(13)  | -41.7(5)   |
| C(21)-C(16)-N(3)-C(13)  | 139.8(3)   |
| C(17)-C(16)-N(3)-C(22)  | 129.0(4)   |
| C(21)-C(16)-N(3)-C(22)  | -49.5(5)   |
| C(23)-C(22)-N(3)-C(13)  | 126.6(4)   |
| C(27)-C(22)-N(3)-C(13)  | -55.5(5)   |
| C(23)-C(22)-N(3)-C(16)  | -44.3(5)   |
| C(27)-C(22)-N(3)-C(16)  | 133.5(4)   |
| N(5)-C(36)-N(4)-C(38)   | 0.3(3)     |
| N(5)-C(36)-N(4)-Zn(1)   | 163.86(18) |
| C(37)-C(38)-N(4)-C(36)  | -0.2(3)    |
| C(39)-C(38)-N(4)-C(36)  | -179.7(3)  |
| C(37)-C(38)-N(4)-Zn(1)  | -161.4(2)  |
| C(39)-C(38)-N(4)-Zn(1)  | 19.2(4)    |
| N(4)-C(36)-N(5)-C(37)   | -0.2(3)    |
| N(4)-C(36)-N(5)-C(63)   | 176.3(3)   |
| C(38)-C(37)-N(5)-C(36)  | 0.0(3)     |
| C(38)-C(37)-N(5)-C(63)  | -176.4(3)  |
| C(64)-C(63)-N(5)-C(36)  | 127.8(3)   |
| C(64)-C(63)-N(5)-C(37)  | -56.4(4)   |
| C(56)-C(51)-N(6)-C(48)  | -163.6(3)  |
| C(52)-C(51)-N(6)-C(48)  | 16.2(4)    |
| C(56)-C(51)-N(6)-C(57)  | 31.5(4)    |

|                        |           |
|------------------------|-----------|
| C(52)-C(51)-N(6)-C(57) | -148.7(3) |
| C(49)-C(48)-N(6)-C(51) | 53.8(4)   |
| C(47)-C(48)-N(6)-C(51) | -123.7(3) |
| C(49)-C(48)-N(6)-C(57) | -140.9(3) |
| C(47)-C(48)-N(6)-C(57) | 41.6(4)   |
| C(58)-C(57)-N(6)-C(51) | 35.1(4)   |
| C(62)-C(57)-N(6)-C(51) | -145.7(3) |
| C(58)-C(57)-N(6)-C(48) | -129.9(3) |
| C(62)-C(57)-N(6)-C(48) | 49.2(4)   |

## 6. Fluorescence decay curves

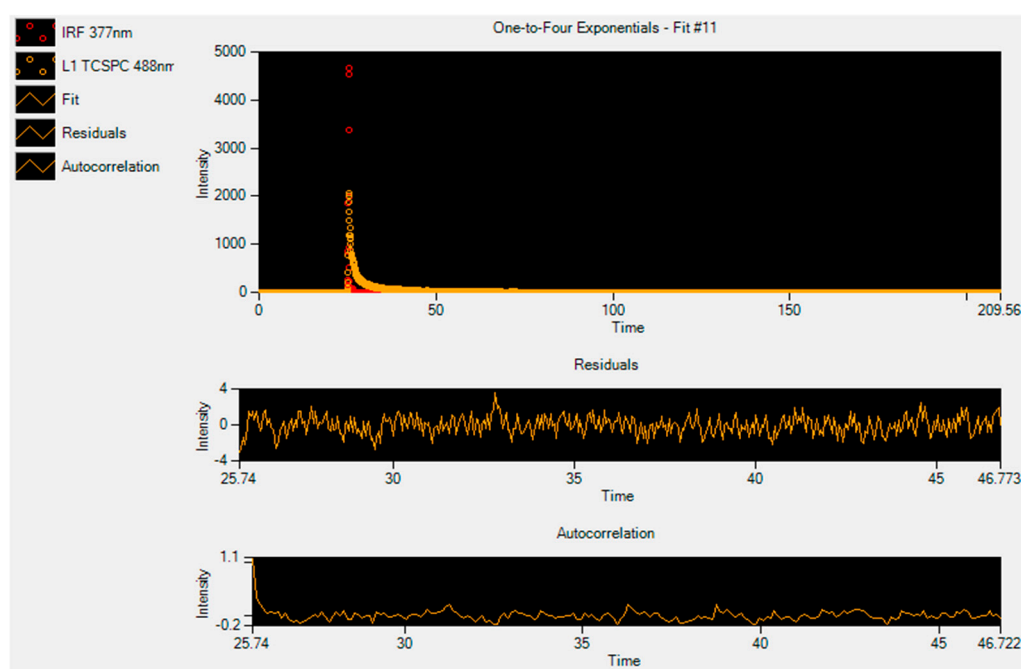

Figure S13: The fluorescence decay curve of **ImL1**.

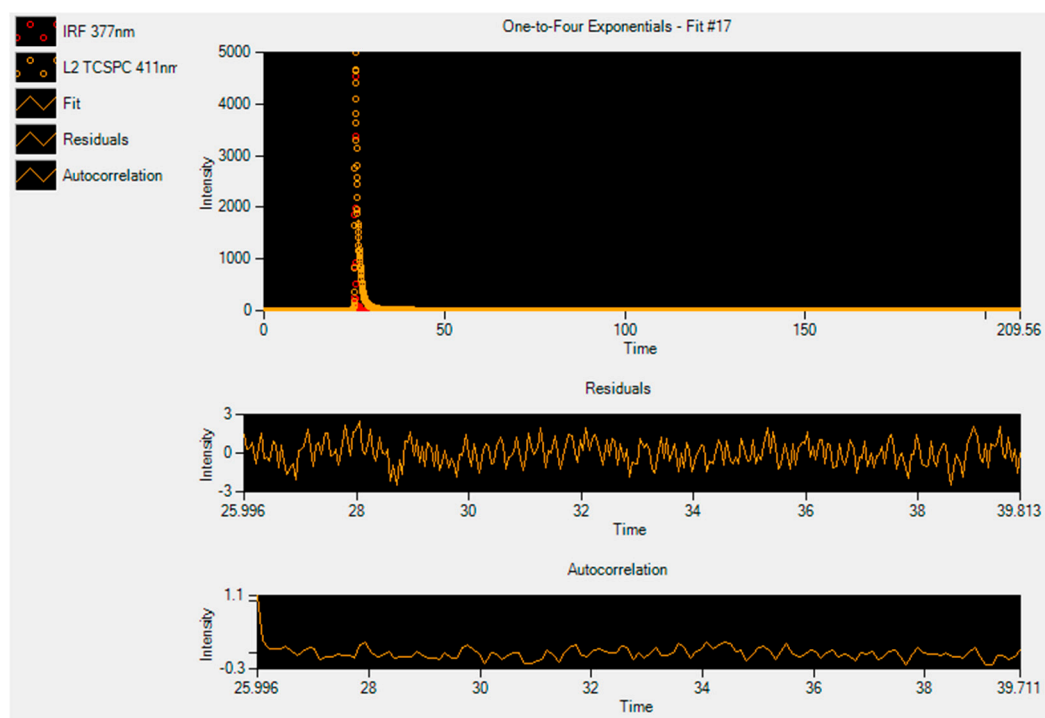Figure S14: The fluorescence decay curve of **ImL2**.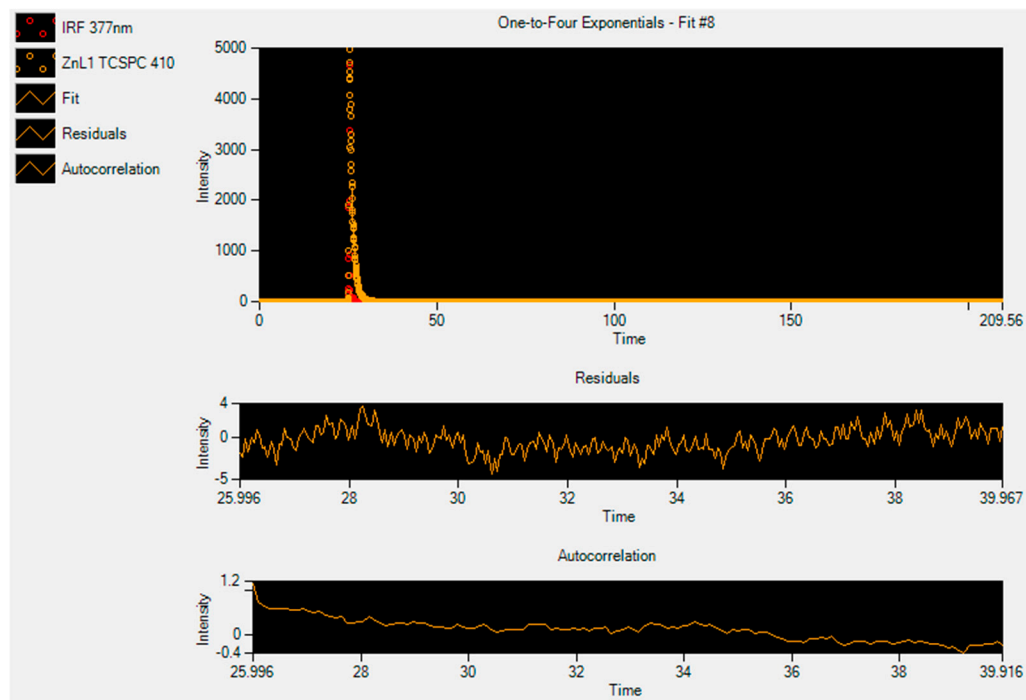Figure S15: The fluorescence decay curve of **ZnCl<sub>2</sub>(ImL1)<sub>2</sub>**.

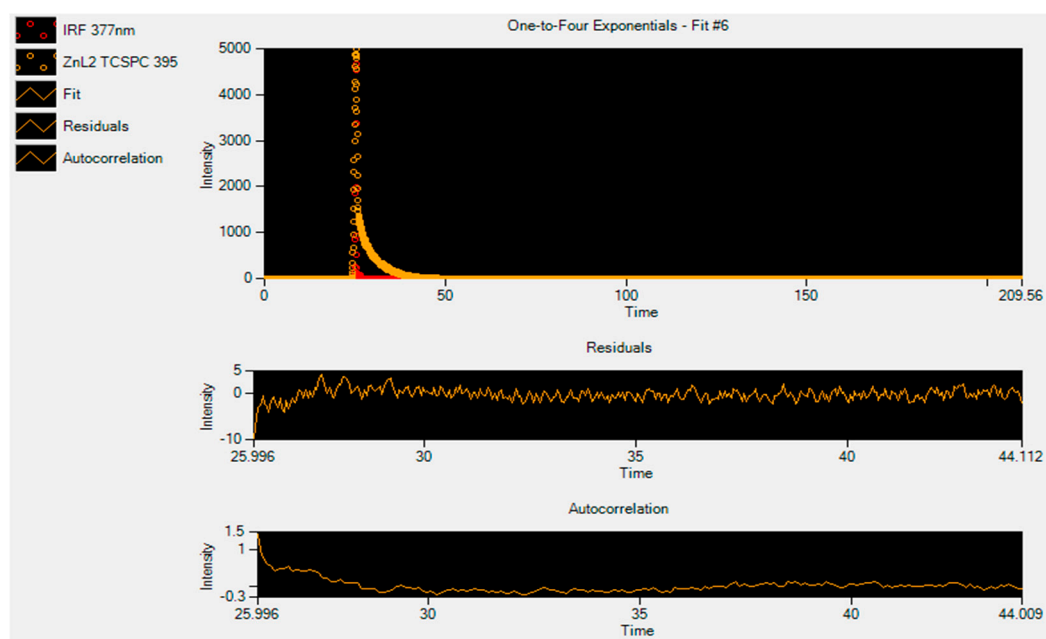

Figure S16: The fluorescence decay curve of  $\text{ZnCl}_2(\text{ImL2})_2$ .

**Disclaimer/Publisher's Note:** The statements, opinions and data contained in all publications are solely those of the individual author(s) and contributor(s) and not of MDPI and/or the editor(s). MDPI and/or the editor(s) disclaim responsibility for any injury to people or property resulting from any ideas, methods, instructions or products referred to in the content.
